# Supplementary material for: Switching between DNA binding modes with a photo- and redox-active DNA-targeting ligand, part II: the influence of the substitution pattern
Source: Royal Society of Chemistry journal article supplement (doi:10.1039/d3ob00879g), 2023-01-01
Supplement: d3ob00879g1.pdf [file d3ob00879g1.pdf]

## Electronic Supplementary Information

### Table of contents

|                                                                                         |     |
|-----------------------------------------------------------------------------------------|-----|
| 1. Studies on the conversion of benzoquinolizinium <b>3b</b> to benzothiophene <b>6</b> | S2  |
| 2. Absorption and emission properties                                                   | S15 |
| 3. Photoreactions of <b>4b</b>                                                          | S17 |
| 4. Thioester cleavage of <b>2b</b> by esterase                                          | S18 |
| 5. DNA-binding studies                                                                  | S19 |
| 6. NMR spectra of <b>2b</b> , <b>3b</b> , <b>4b</b> and <b>6</b>                        | S25 |

## 1. Studies on the conversion of benzoquinolizinium 3b to benzothiophene 6

### 1.1 Conversion of 3b to 6 in DMSO-*d*<sub>6</sub>

A solution of **3b** (3.5 mg) in DMSO-*d*<sub>6</sub> (600 μL) was monitored by <sup>1</sup>H-NMR spectroscopy by recording a spectrum every 10 min for 5 h (Figure S1). The conversion was analyzed with a plot of the change of the integrals of protons 6-H (**3b**, 10.70 ppm) and 7-H (**6**, 7.63 ppm) versus time (Figure S2). The resulting product was identified as the 2-benzo[*c*]thiophen-4-ylmethyl pyridine (**7**). <sup>1</sup>H-NMR (500 MHz, DMSO-*d*<sub>6</sub>): δ = 4.64 (s, 2H, CH<sub>2</sub>), 6.92 (dd, <sup>3</sup>*J* = 7 Hz, <sup>4</sup>*J* = 1 Hz, 1H, 5-H), 7.05 (dd, <sup>3</sup>*J* = 9 Hz, <sup>3</sup>*J* = 7 Hz, 1H, 6-H), 7.63 (d, <sup>3</sup>*J* = 9 Hz, 1H, 7-H), 7.78 (d, <sup>3</sup>*J* = 8.0 Hz, 1H, 3'-H), 7.82 (t, <sup>3</sup>*J* = 7 Hz, 1H, 5'-H), 8.08 (s, 2H, 1-H, 3-H), 8.35 (t, <sup>3</sup>*J* = 8 Hz, 1H, 4'-H), 8.81–8.84 (m, 1H, 6'-H). – <sup>13</sup>C-NMR: (150 MHz, DMSO-*d*<sub>6</sub>): δ = 37.2 (CH<sub>2</sub>), 116.3 (C3), 119.1 (C1), 121.7 (C7), 123.4 (C6), 123.8 (C5), 124.6 (C5'), 126.7 (C3'), 129.0 (C4), 137.2 (C3a), 138.2 (C7a), 143.1 (C6'), 145.0 (C4'), 155.5 (C2').

### 1.2 Protonation of the free base of 6

To a solution of **6** derived from **3b** (3.2 mg) in DMSO-*d*<sub>6</sub> (600 μL) (see above) were added 2 molar equivalents of hydrobromic acid (aq. 48%) and an <sup>1</sup>H-NMR spectrum was recorded directly after addition of the acid and after 3 h of addition (Figure S8).

### 1.3 Conversion of 3b to 7 in D<sub>2</sub>O

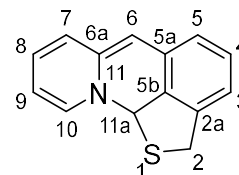

A mixture of **3b** (3.5 mg) in D<sub>2</sub>O (600 μL) was suspended in an ultrasonic bath for 1 min until all components were dissolved. The resulting yellow solution was submitted to NMR-spectroscopic analysis (<sup>1</sup>H-, <sup>13</sup>C-NMR, 1D-sel-TOCSY, TOCSY, COSY, HSQC, HMBC; Figure S9–13). The main compound (78%) present in the solution was identified as the 2,11a-dihydropyrido[1,2-*b*]thieno[4,3,2-*ij*]isoquinoline (**7**). <sup>1</sup>H-NMR (600 MHz, D<sub>2</sub>O): δ = 4.52 (dd, <sup>4</sup>*J* = 14 Hz, <sup>5</sup>*J* = 3 Hz, 1H, 11a-H), 4.82 [d, <sup>4</sup>*J* = 14 Hz (determined from 1D sel. TOCSY), 2H, 2-H], 7.11 (d, <sup>5</sup>*J* = 3 Hz, 1H, 6-H), 7.41 (d, <sup>3</sup>*J* = 8 Hz, 1H, 3-H), 7.48 (d, <sup>3</sup>*J* = 7 Hz, 1H, 5-H), 7.54 (t, <sup>3</sup>*J* = 8 Hz, 1H, 4-H), 8.00 (t, <sup>3</sup>*J* = 7 Hz, 1H, 9-H), 8.14 (d, <sup>3</sup>*J* = 8 Hz, 1H, 7-H), 8.48 (t, <sup>3</sup>*J* = 8 Hz, 1H, 8-H), 9.21 (d, <sup>3</sup>*J* = 7 Hz, 1H, 10H). – <sup>13</sup>C-NMR (150 MHz, D<sub>2</sub>O): δ = 42.8 (C11a, C2), 80.2 (C6), 126.8 (C3), 128.0 (C5), 128.4 (C9), 130.5 (C7), 133.1 (C5a), 133.9 (C4), 137.9 (C5b), 140.9 (C2a), 144.6 (C10), 148.3 (C8), 156.5 (C6a).

Another  $^1\text{H}$ -NMR spectrum was recorded after 2 d to investigate whether **7** is transformed to **6** (Figure S14). However, the spectrum indicated that **7** decomposed steadily over time.

#### 1.4 Conversion of **3b** to **6-D** in $\text{CD}_3\text{OD}$

A solution of **3b** (2.6 mg) in  $\text{CD}_3\text{OD}$  (600  $\mu\text{L}$ ) was monitored by  $^1\text{H}$ -NMR spectroscopy for 5 d (Figure S15). The resulting product was analyzed by  $^1\text{H}$ - and  $^{13}\text{C}$ -NMR and COSY, HSQC and HMBC experiments (Figures S16–20). The resulting product was identified as the 2-benzo[*c*]thiophen-4-ylmethyl pyridine (**6-D**).  $^1\text{H}$ -NMR (500 MHz,  $\text{CD}_3\text{OD}$ ):  $\delta$  = 4.73 (s, 1H, CDH) 6.97 (dt,  $^3J$  = 7 Hz,  $^4J$  = 1 Hz, 1H, 5-H), 7.08 (dd,  $^3J$  = 9 Hz,  $^3J$  = 7 Hz, 1H, 6-H), 7.67 (d,  $^3J$  = 9 Hz, 1H, 7-H), 7.80 (dd,  $^4J$  = 3 Hz,  $^4J$  = 1 Hz, 1H, 1-H), 7.90 (d,  $^3J$  = 8 Hz, 1H, 3'-H), 7.94 (d,  $^4J$  = 3 Hz, 1H, 3-H), 7.95–7.98 (m, 1H, 5'-H), 8.51 (td,  $^3J$  = 8 Hz,  $^4J$  = 2 Hz, 1H, 4'-H), 8.77 (ddd,  $^3J$  = 6 Hz,  $^4J$  = 2 Hz,  $^5J$  = 1 Hz, 1H, 6'-H). –  $^{13}\text{C}$ -NMR (150 MHz,  $\text{CD}_3\text{OD}$ ):  $\delta$  = 37.8 ( $\text{CH}_2\text{-D}_1$ ), 116.2 (C1), 120.1 (C3), 123.6 (C7), 124.4 (C6), 125.9 (C5), 126.5 (C5'), 128.1 (C4), 129.0 (C3'), 138.7 (C3a), 140.2 (C7a), 142.7 (C6'), 148.3 (C4'), 156.9 (C2').

### 1.5 Stability of **6** in acidic buffer solution

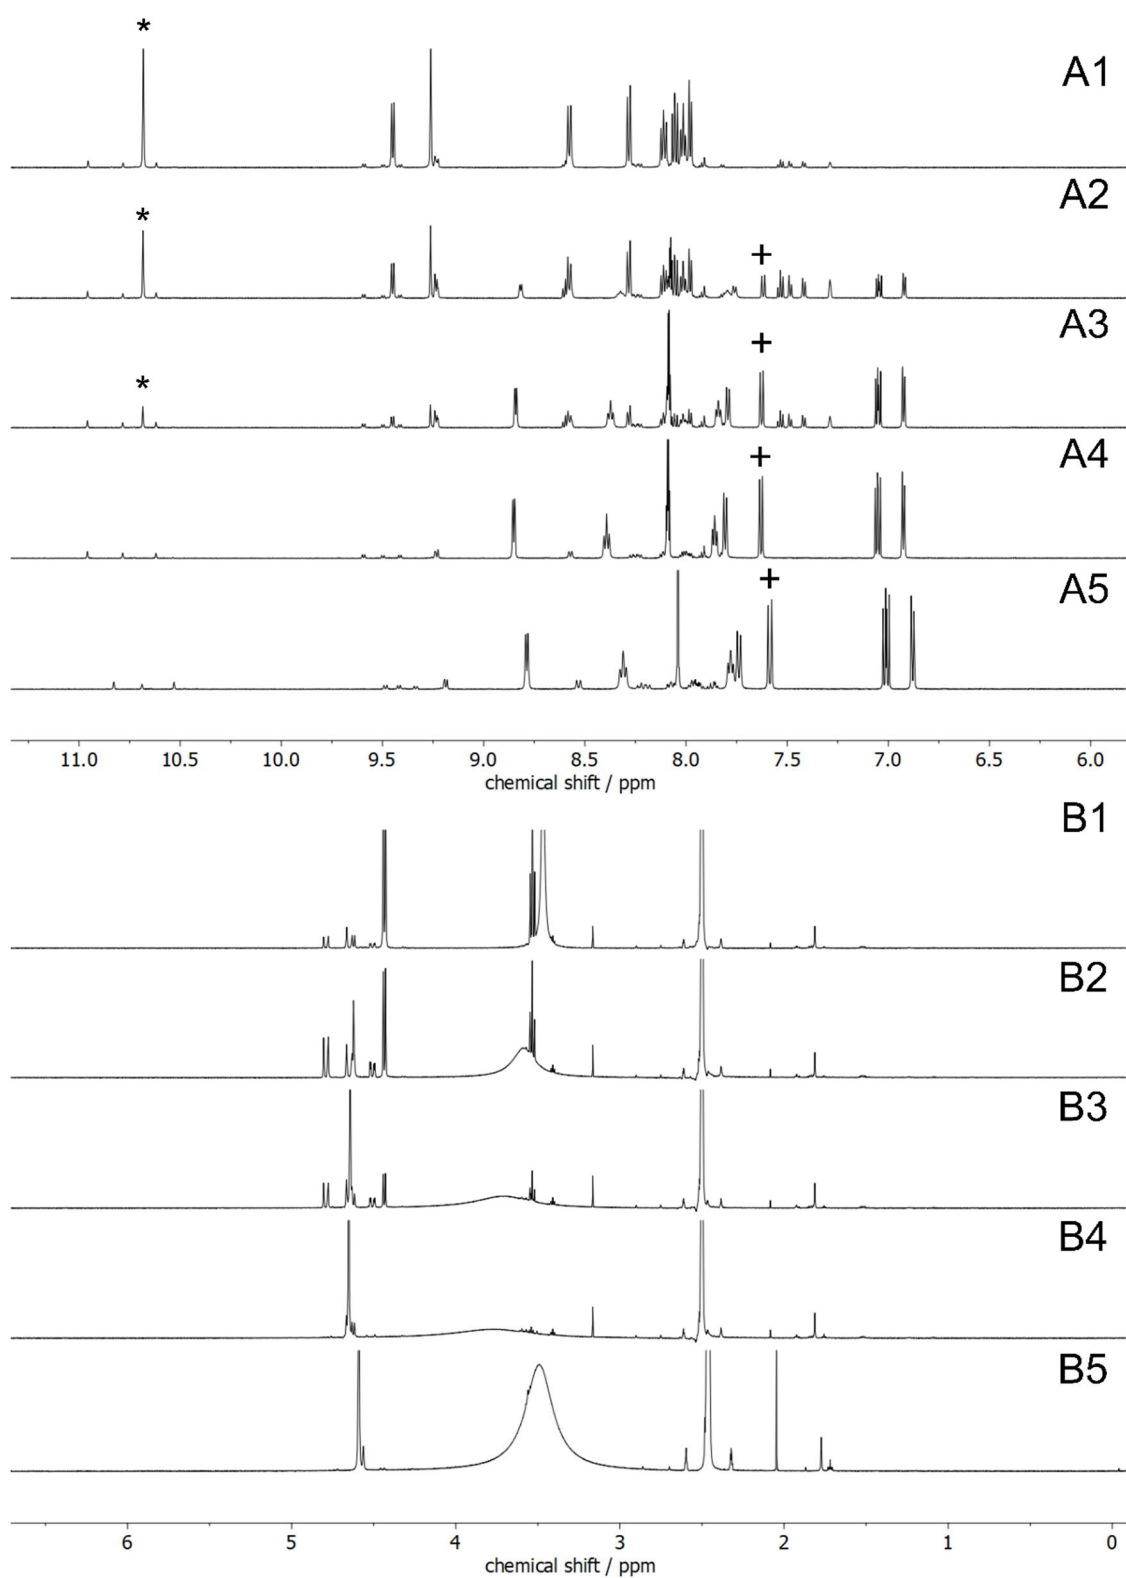

**Figure S1.** <sup>1</sup>H-NMR spectrum (600 MHz, 25 °C) of **3b** in DMSO-*d*<sub>6</sub> (6–11 ppm, A; 0–6 ppm, B) after 3 min (1), 33 min (2), 73 min (3), 293 min (4), and 3 d (5). \*: Characteristic signal of **3b**; +: Characteristic signal of **6**.

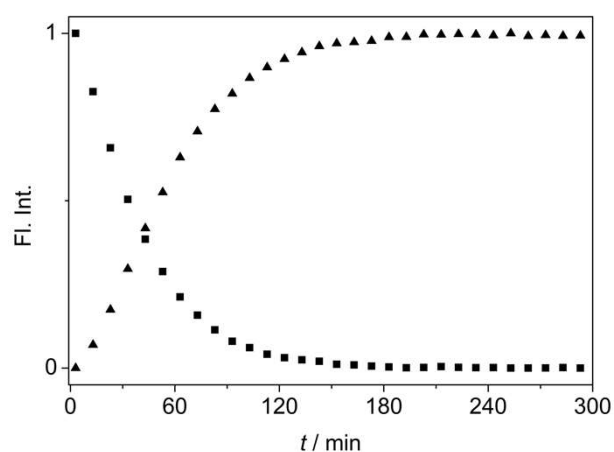

**Figure S2.** Change of the integrals of the  $^1\text{H}$ -NMR signals of 6-H of **3b** (10.70 ppm, squares) and 7-H of **7** (7.63 ppm triangles) with time during conversion of **3b** to **6** in  $\text{DMSO}-d_6$ .

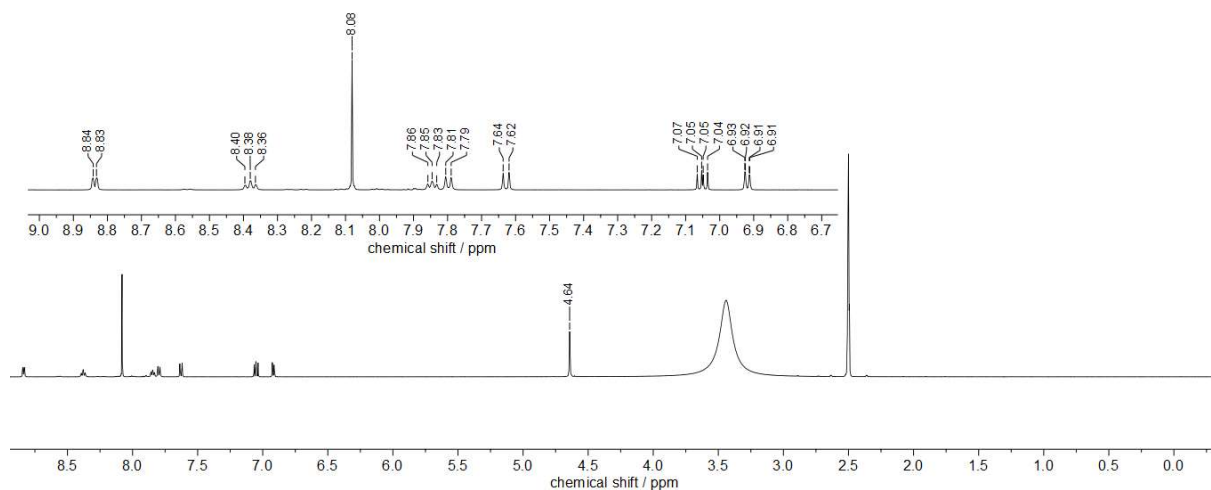

**Figure S3.**  $^1\text{H}$ -NMR spectrum (500 MHz,  $\text{DMSO}-d_6$ , 25  $^\circ\text{C}$ ) of **6** derived from **3b**.

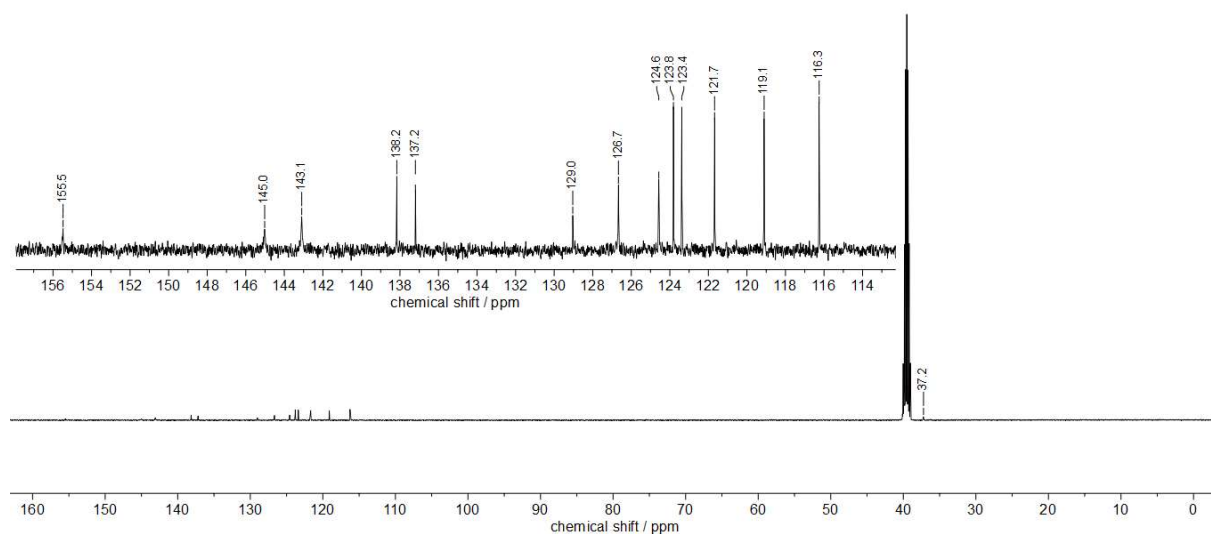

**Figure S4.**  $^{13}\text{C}$ -NMR spectrum (125 MHz,  $\text{DMSO}-d_6$ , 25  $^\circ\text{C}$ ) of **6** derived from **3b**.

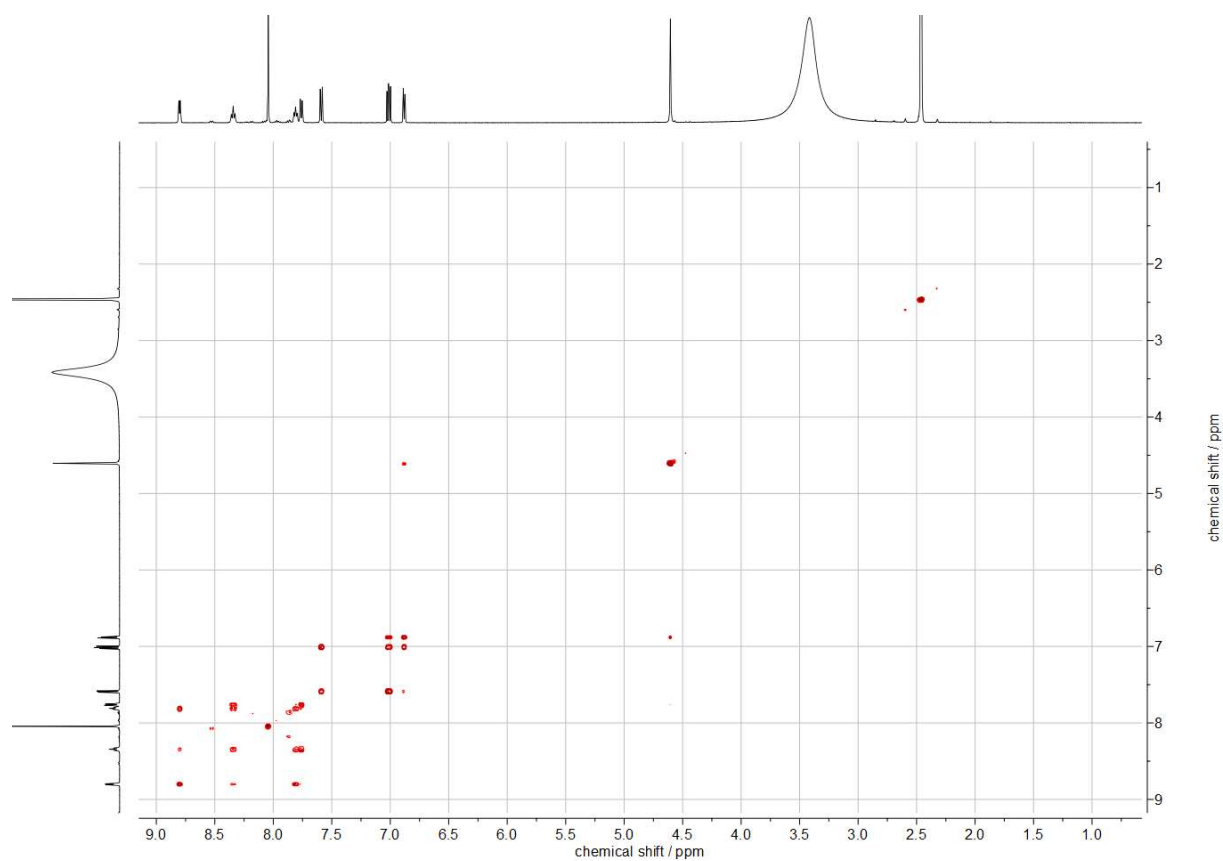

**Figure S5.** HH-COSY spectrum (500 MHz, DMSO- $d_6$ , 25 °C) of **6** derived from **3b**.

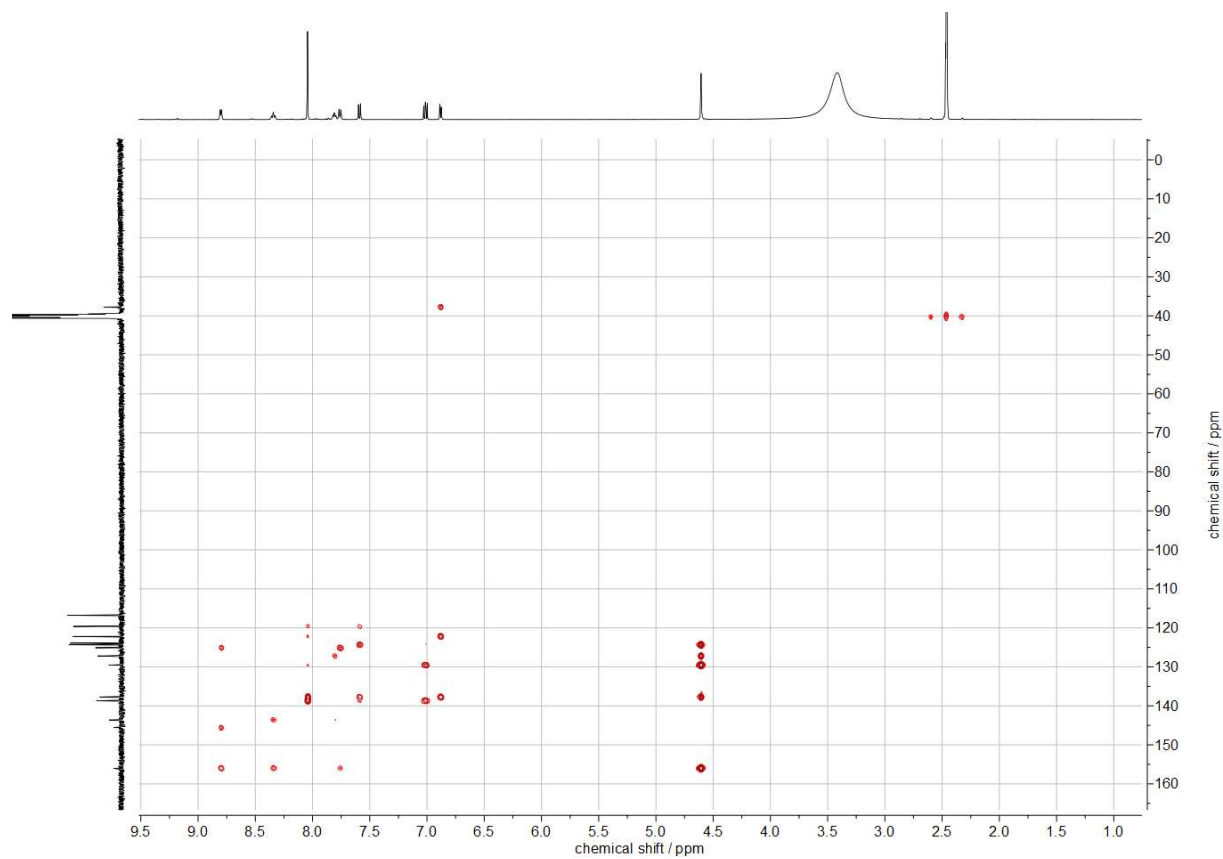

**Figure S6.** HSQC spectrum (600 MHz, DMSO- $d_6$ , 25 °C) of **6** derived from **3b**.

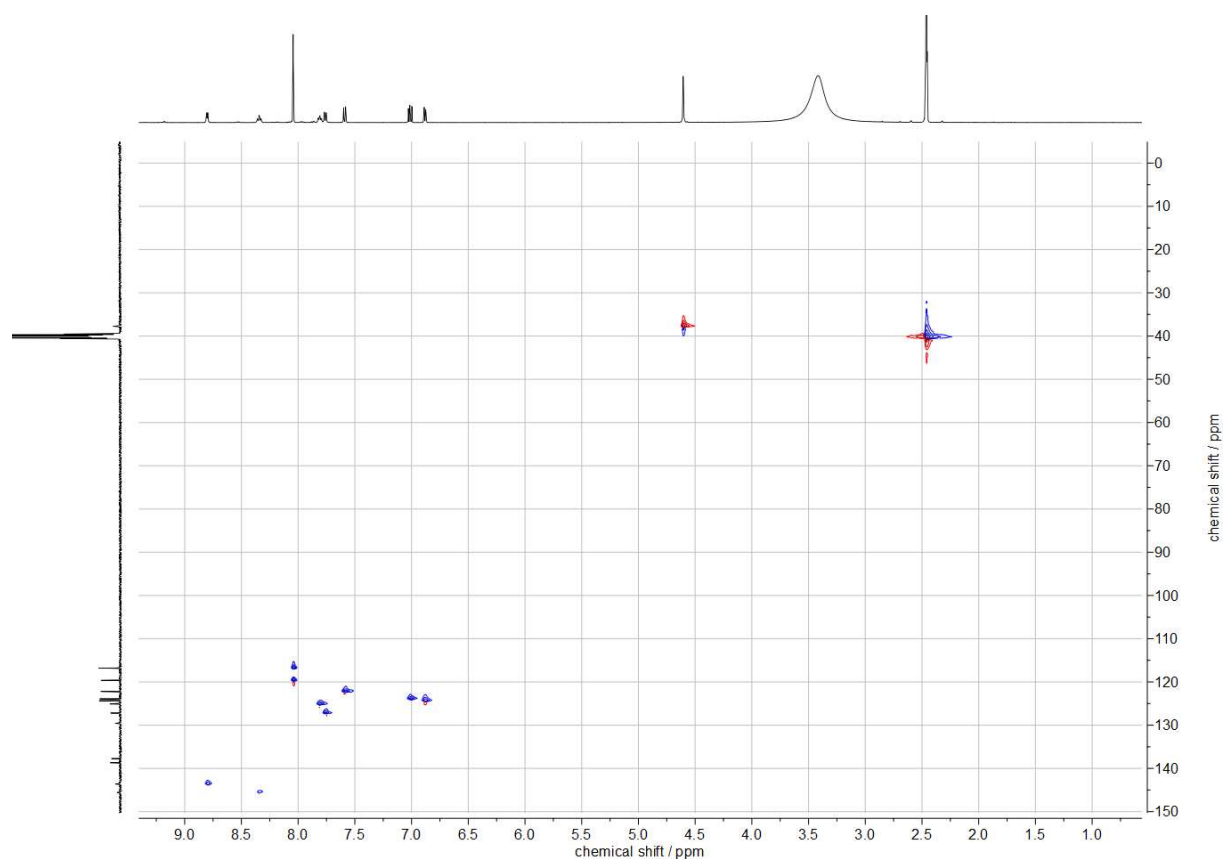

**Figure S7.** HMBC spectrum (500 MHz, DMSO- $d_6$ , 25 °C) of **6** derived from **3b**.

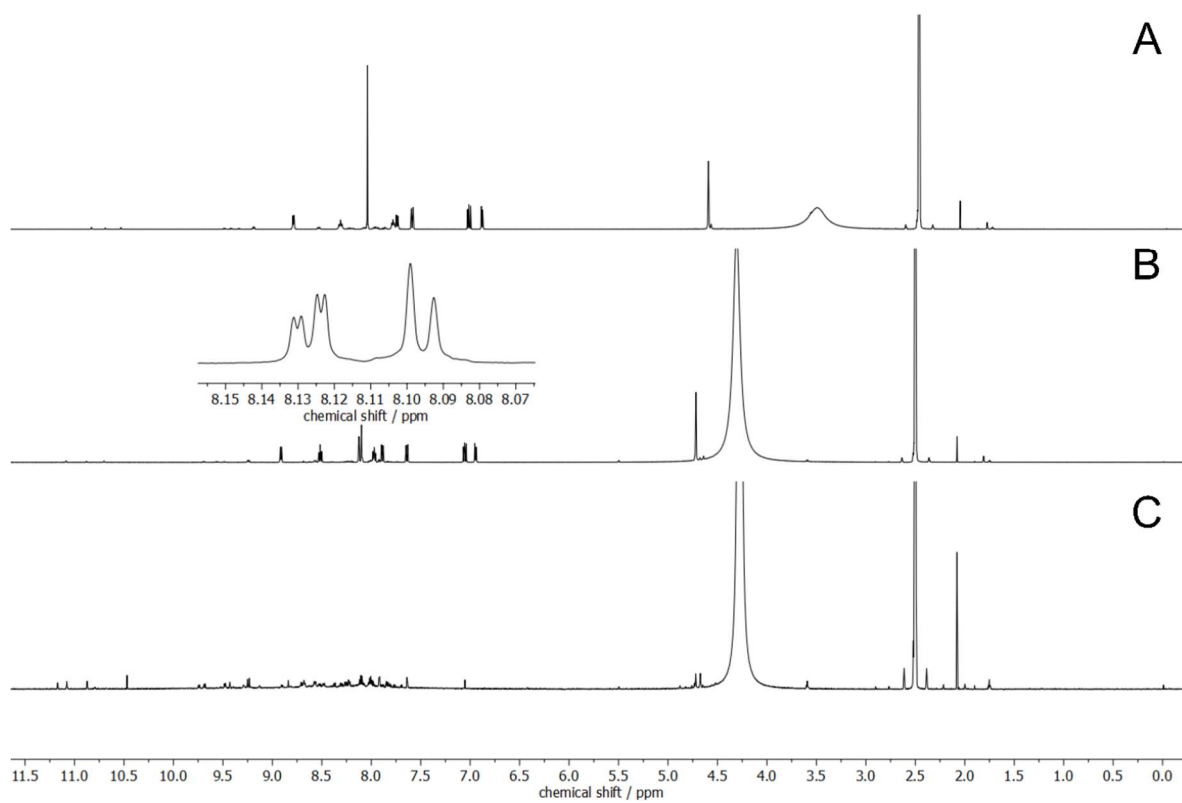

**Figure S8.**  $^1\text{H}$ -NMR spectrum (600 MHz, DMSO- $d_6$ , 25 °C) of **3b** after 5 h (A), after addition of 2 equiv. of aq. HBr (48%) (B), and 5 h after addition of aq. HBr (48%) (C).

After addition of hydrobromic acid to the solution of **6** in DMSO- $d_6$ , the proton signal of 1-H and 3-H were resolved into two different signals (Figure S8B) and the spectrum was the same as the one of **6** after chromatographic work up (Figure S42). After addition of an excess of the acid the compound decomposed steadily, and the solution turned black.

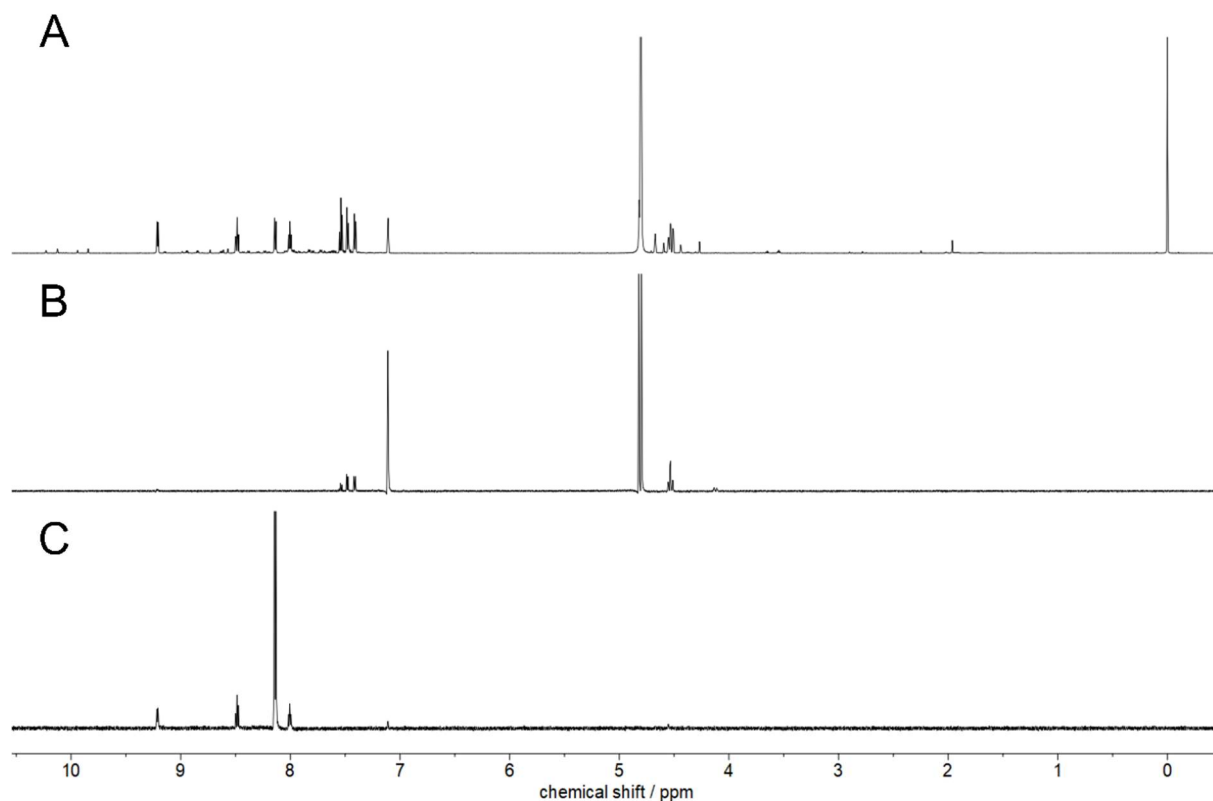

**Figure S9.**  $^1\text{H}$ -NMR spectrum (A, 600 MHz,  $\text{D}_2\text{O}$ ) and 1D-TOCSY spectrum (B, selective excitation pulse at 4.52 ppm; C, selective excitation pulse at 9.21 ppm) of **3b** directly after sample preparation.

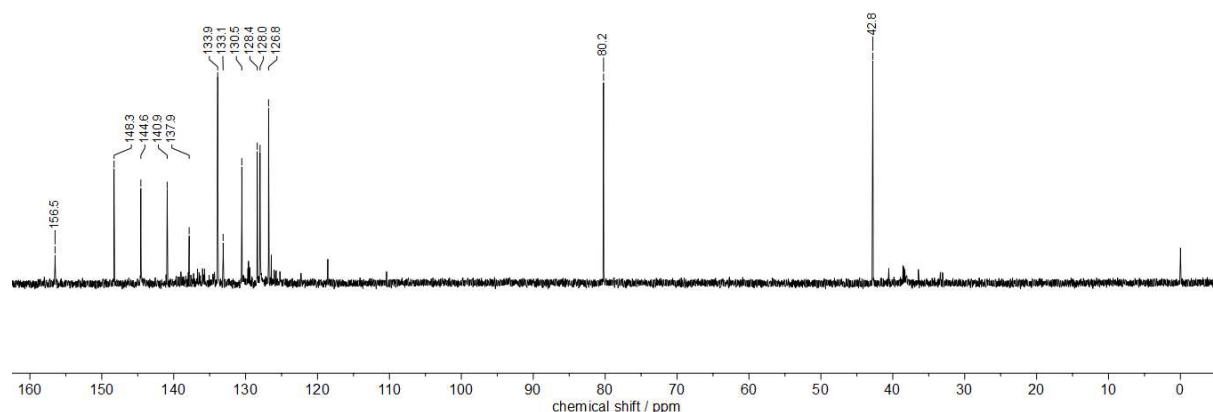

**Figure S10.**  $^{13}\text{C}$ -NMR spectrum (125 MHz,  $\text{D}_2\text{O}$ , 25 °C) of **7** derived from **3b**.



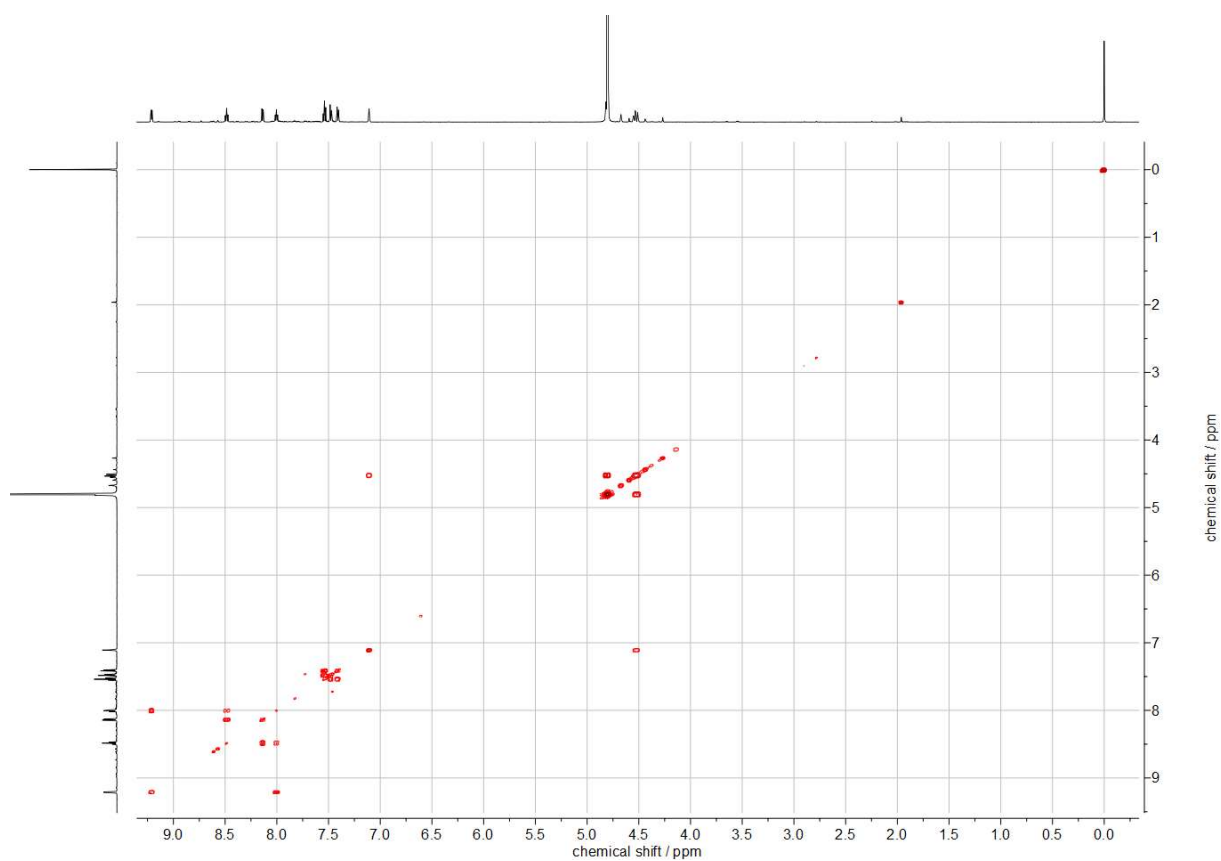

**Figure S11.** HH-COSY spectrum (500 MHz, D<sub>2</sub>O, 25 °C) of **7** derived from **3b**.

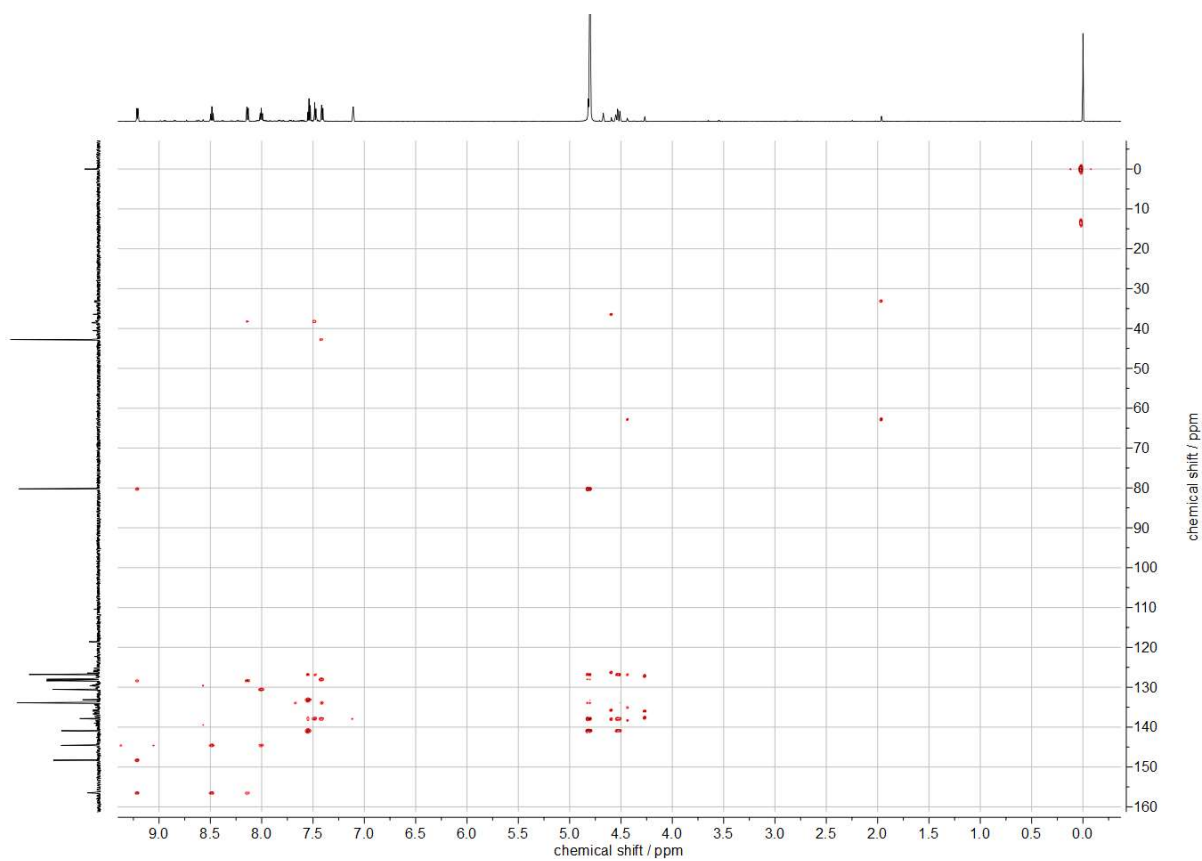

**Figure S12.** HSQC spectrum (500 MHz, D<sub>2</sub>O, 25 °C) of **7** derived from **3b**.

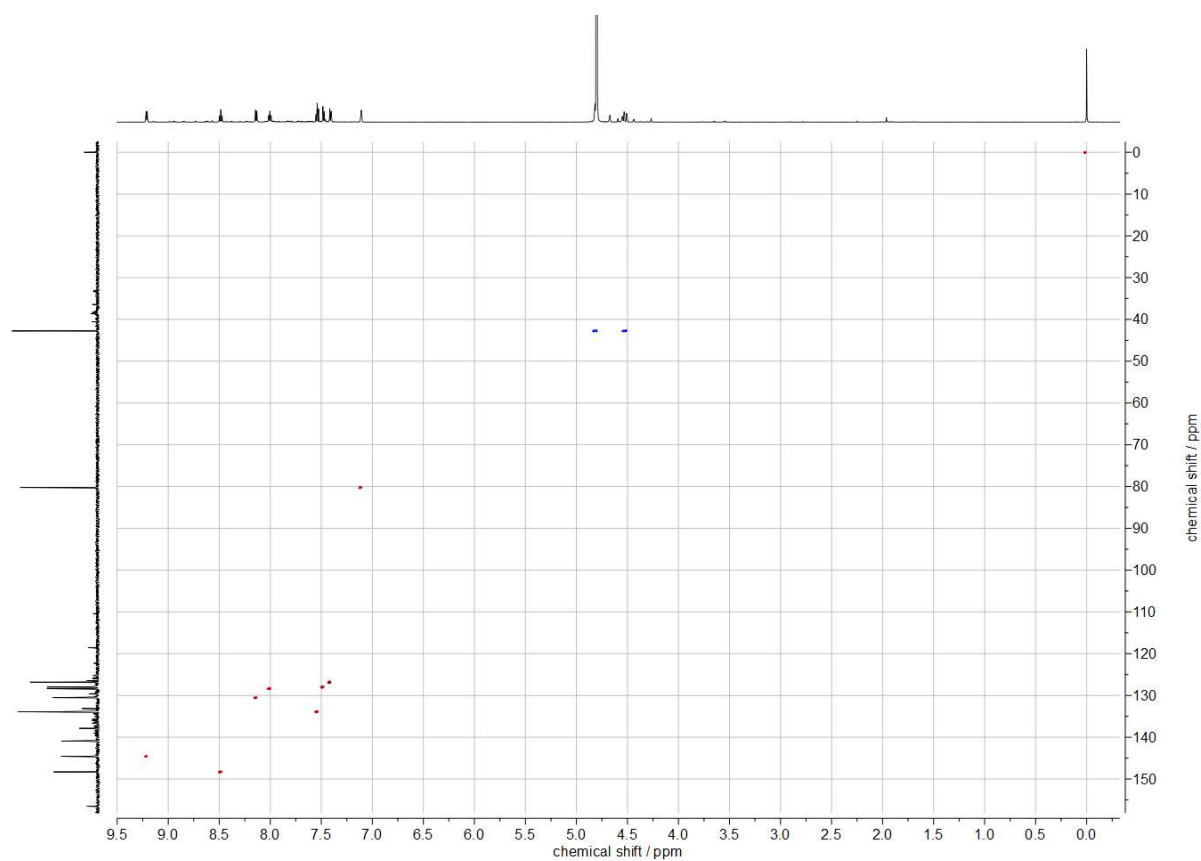

**Figure S13.** HMBC spectrum (500 MHz, D<sub>2</sub>O, 25 °C) of **7** derived from **3b**.

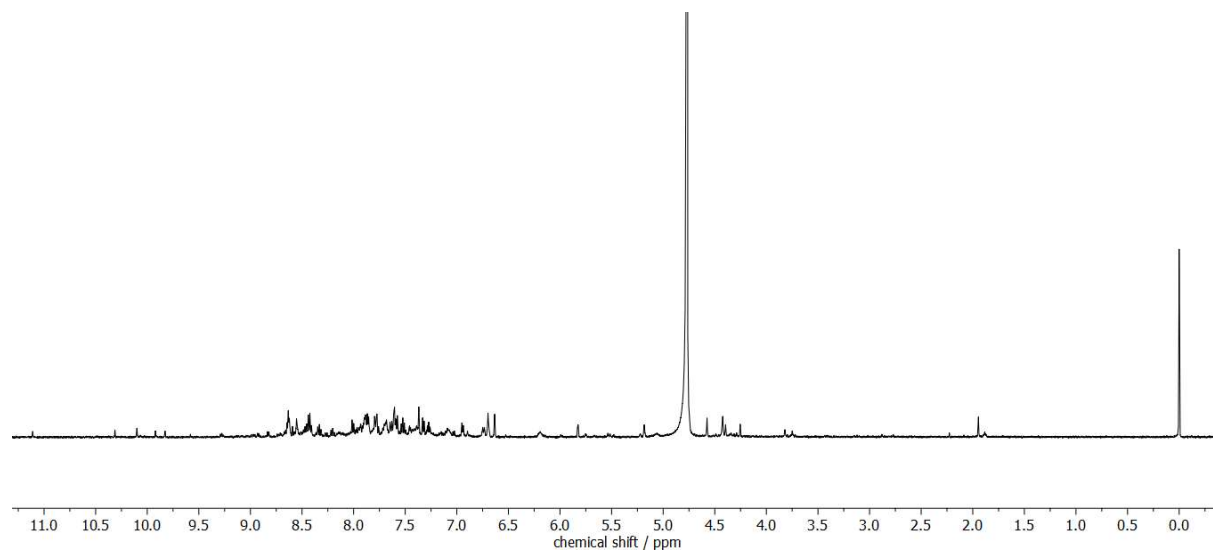

**Figure S14.** <sup>1</sup>H-NMR spectrum (500 MHz, D<sub>2</sub>O, 25 °C) of **7** derived from **3b** after 2 d.

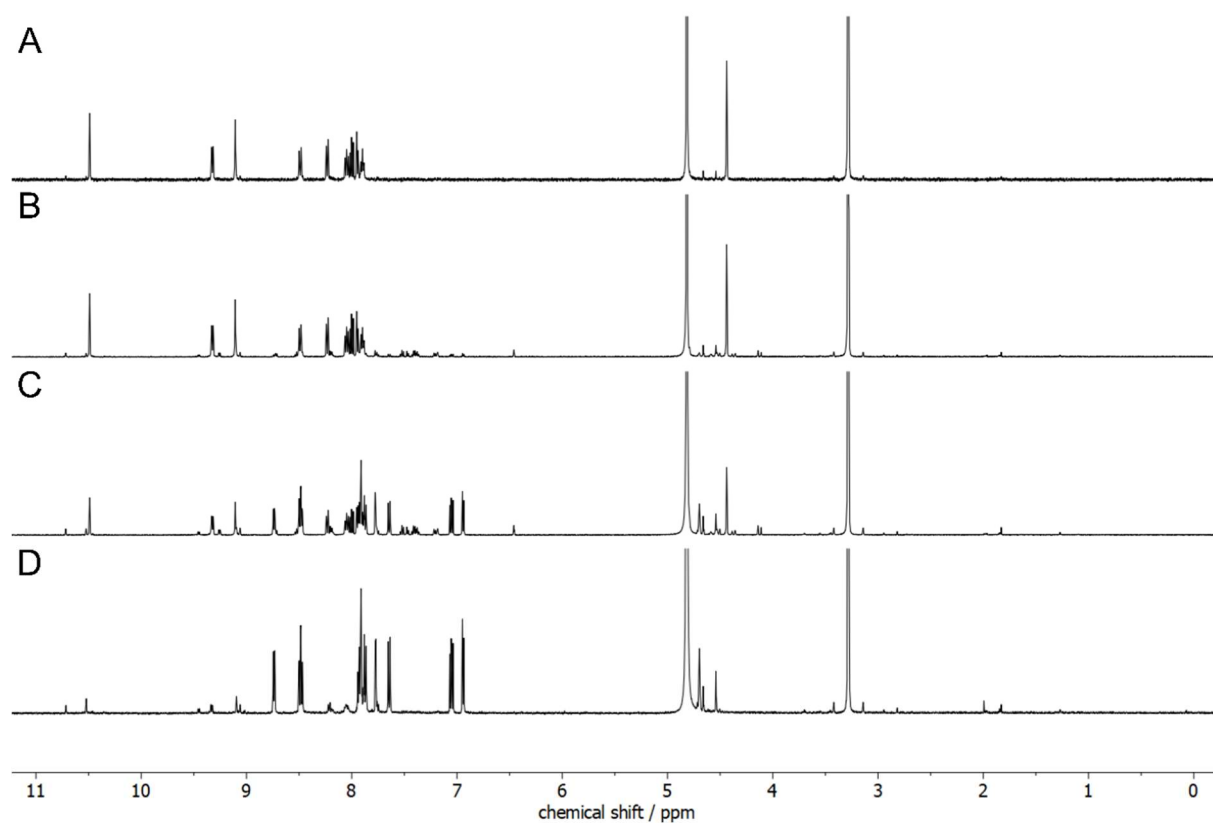

**Figure S15.**  $^1\text{H}$ -NMR spectrum (500 MHz,  $\text{CD}_3\text{OD}$ , 25  $^\circ\text{C}$ ) of **3b** after 3 min (A), 3 h (B), 1 d (C) and 5 d (D).

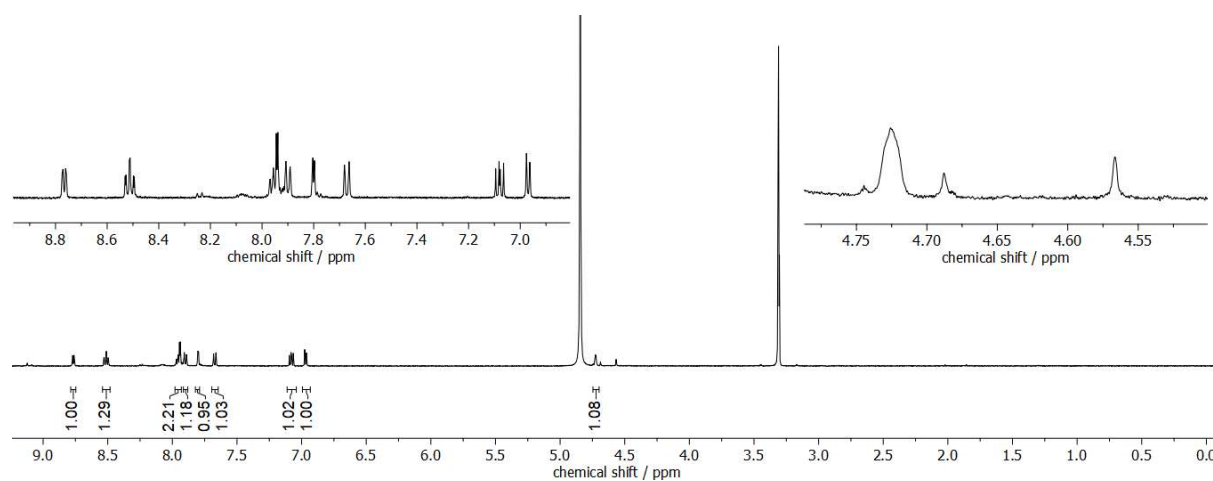

**Figure S16.**  $^1\text{H}$ -NMR spectrum (500 MHz,  $\text{CD}_3\text{OD}$ , 25  $^\circ\text{C}$ ) of **6-D<sup>+</sup>** derived from **3b**.

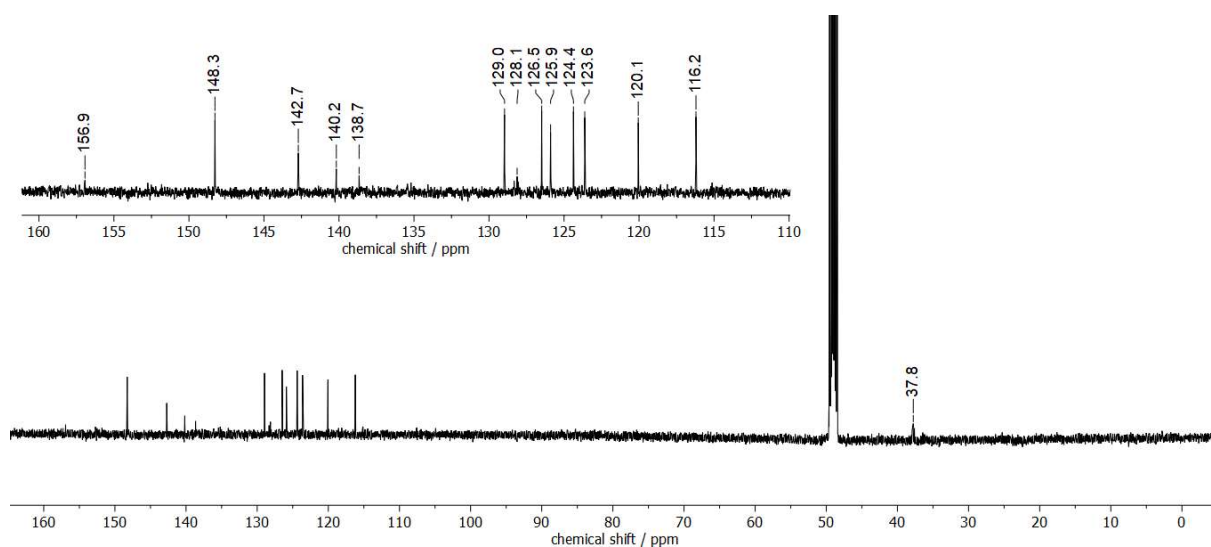

**Figure S17.**  $^{13}\text{C}$ -NMR spectrum (150 MHz,  $\text{CD}_3\text{OD}$ , 25 °C) of **6-D<sup>+</sup>** derived from **3b**.

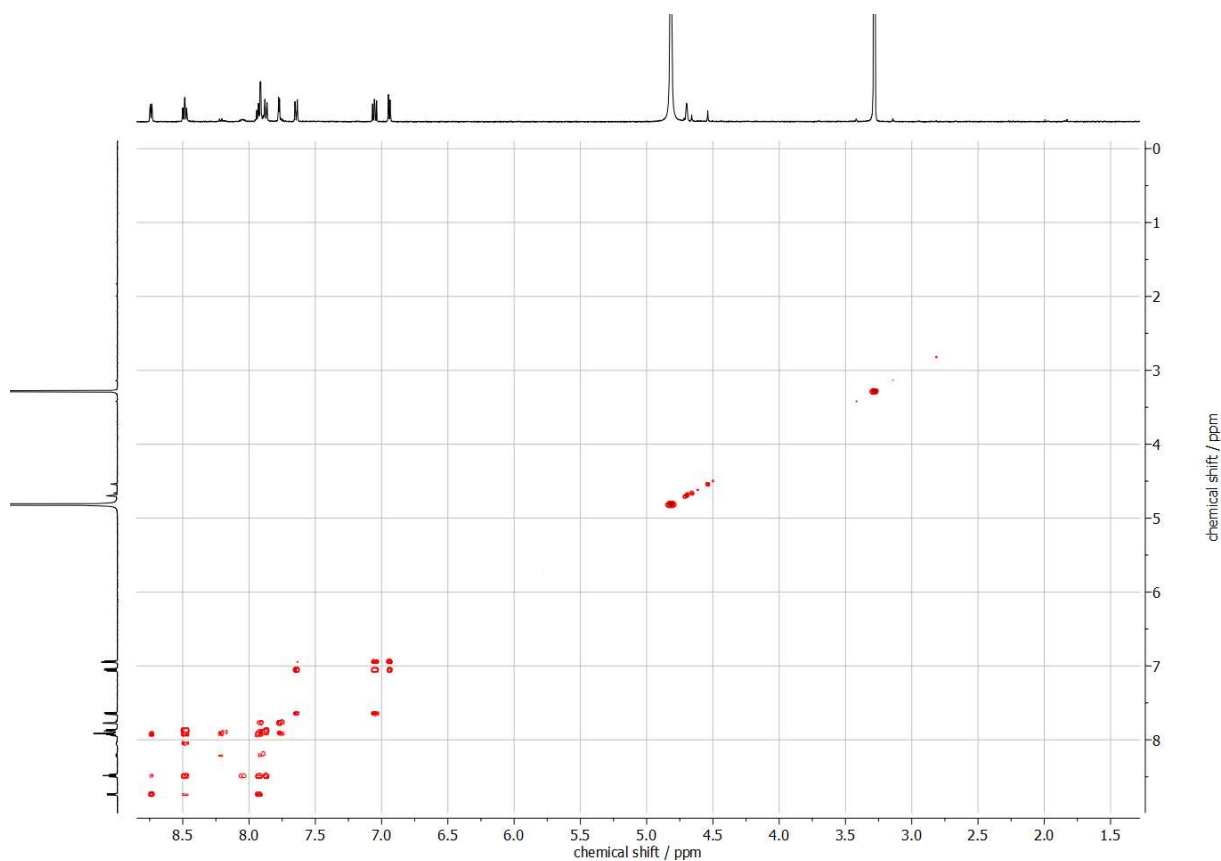

**Figure S18.** HH-COSY spectrum (500 MHz,  $\text{CD}_3\text{OD}$ , 25 °C) of **6-D<sup>+</sup>** derived from **3b**.

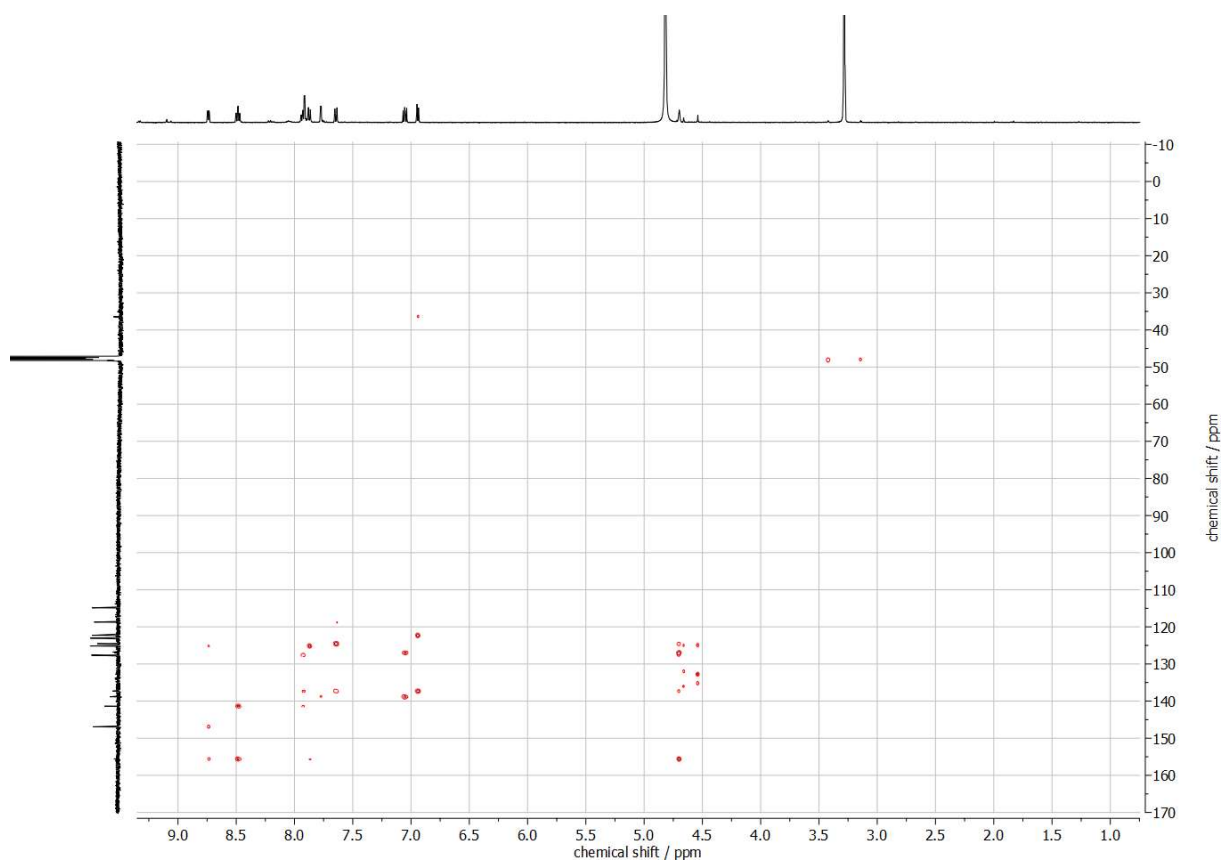

**Figure S19.** HSQC spectrum (500 MHz,  $\text{CD}_3\text{OD}$ , 25  $^\circ\text{C}$ ) of **6-D<sup>+</sup>** derived from **3b**.

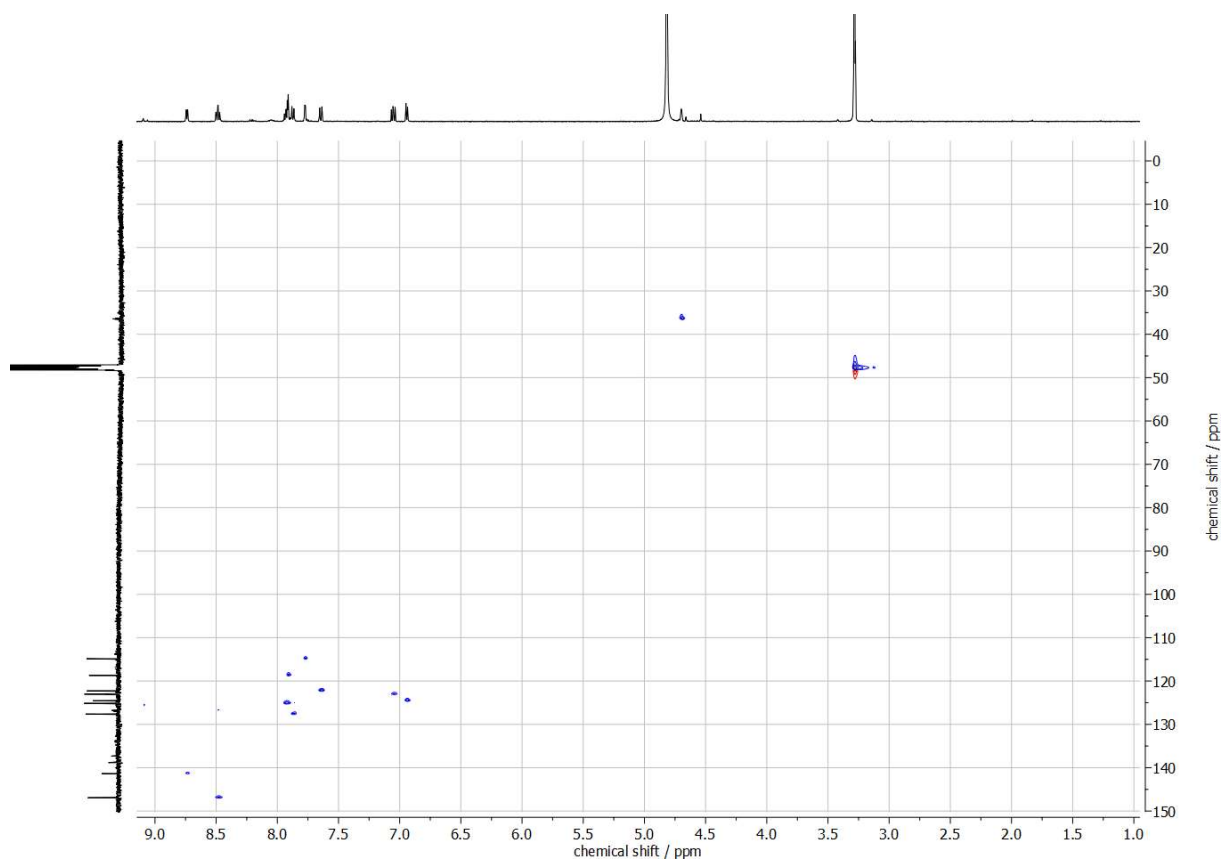

**Figure S20.** HMBC spectrum (500 MHz,  $\text{CD}_3\text{OD}$ , 25  $^\circ\text{C}$ ) of **6-D<sup>+</sup>** derived from **3b**.

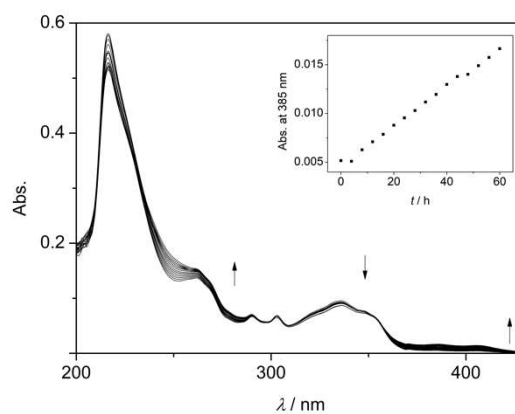

**Figure S21.** Photometric monitoring of the thermal treatment of **6** ( $T = 37\text{ }^{\circ}\text{C}$ ,  $c = 20\text{ }\mu\text{M}$ , acetate buffer,  $\text{pH} = 5.00$ ,  $t = 60\text{ h}$ ). Inset: Change of absorbance with time.

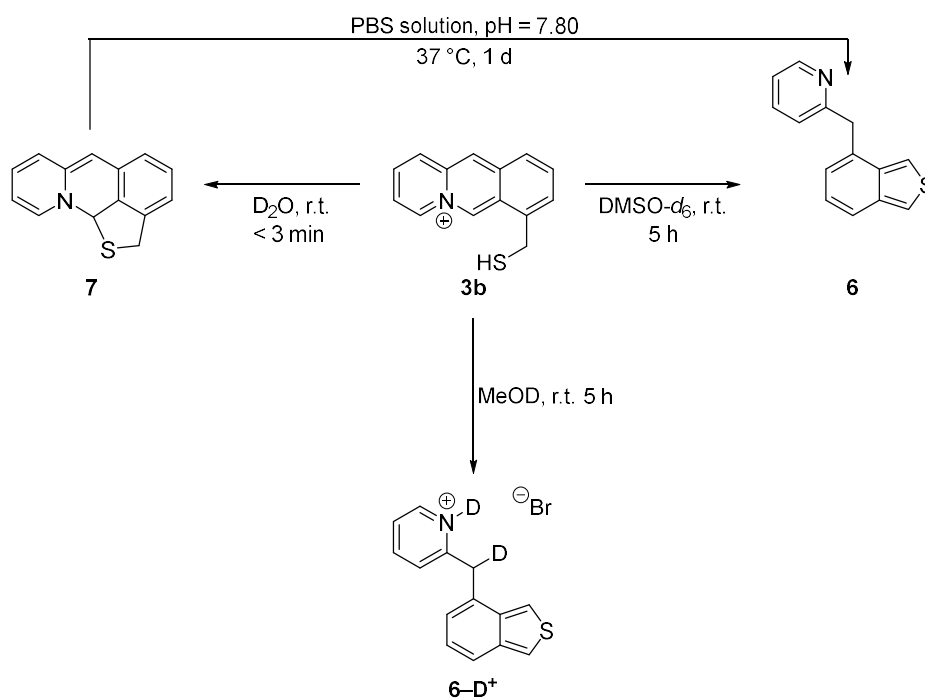

**Scheme S1.** Reactivity of **3b** in different solvents.

## 2. Absorption and emission properties

For the measurement of absorption and emission spectra of **2b** and **4b**, aliquots of stock solutions ( $c = 1$  mM, MeOH or MeCN) were evaporated under a stream of nitrogen gas, and the residue was redissolved in the respective solvent. In general, absorption spectra were recorded with a scan rate of  $120\text{ nm min}^{-1}$  from 200 to 600 nm and subsequently smoothed with the Origin software (OriginLab, 8.5.1) with the adjacent-averaging function (factor 10). For the detection of emission spectra, the excitation and emission slits were adjusted to 5 nm. The scan rate was  $120\text{ nm min}^{-1}$  and the detector voltage was adjusted to 400–800 V. The spectra were smoothed with the implemented moving-average function (factor 5).

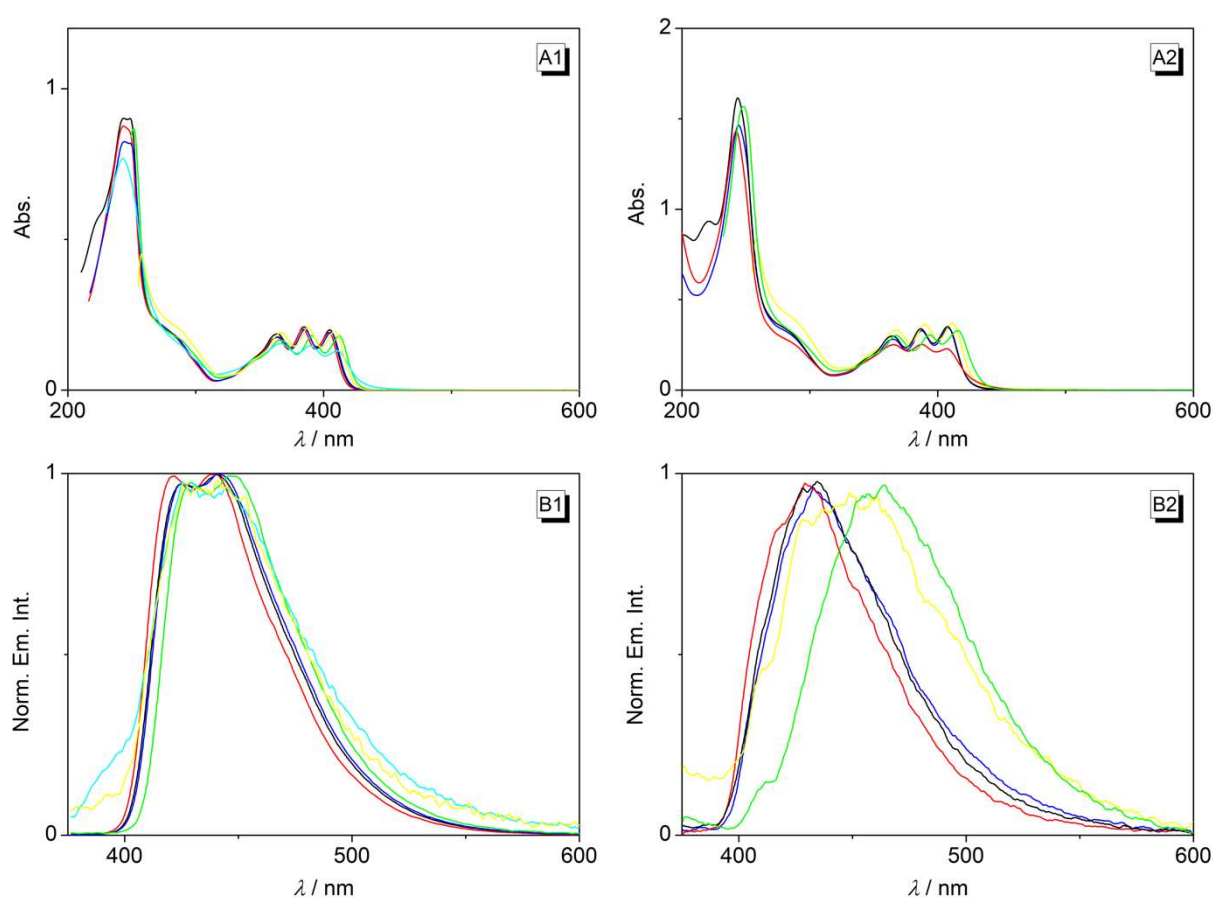

**Figure S22.** Absorption spectra ( $c = 20\text{ }\mu\text{M}$ , A) and normalized emission spectra ( $c = 10\text{ }\mu\text{M}$ , B) of **2b** (1,  $\lambda_{\text{ex}} = 366\text{ nm}$ ) and **4b** (2,  $\lambda_{\text{ex}} = 365\text{ nm}$ ) in CH<sub>2</sub>Cl<sub>2</sub> (green), EtOAc (purple), THF (cyan), DMSO (yellow), CH<sub>3</sub>CN (black), MeOH (blue), and H<sub>2</sub>O (red).

The relative fluorescence quantum yields were determined under identical conditions, i.e., the same cuvettes were used and the measurements were performed at a constant temperature ( $20\text{ }^{\circ}\text{C}$ ) under exclusion of oxygen with the same spectrometer settings (detection wavelength, excitation wavelength, detector voltage, slit bandwidths, collection rate). Anthracene ( $\Phi_{\text{Fl}} =$

0.28 in cyclohexane,  $\lambda_{\text{ex}} = 340 \text{ nm}^1$ ) was used as standard. The emission spectra were collected from solutions with Abs. = 0.10 at the excitation wavelength. After integration of the fluorescence band, the relative fluorescence quantum yields were calculated according to eq. 1.

$$\phi_{\text{FI}} = \frac{J_{\text{x}} (1 - T_{\text{s}}) n_{\text{x}}^2}{J_{\text{s}} (1 - T_{\text{x}}) n_{\text{s}}^2} \cdot \phi_{\text{FI,s}} \quad (\text{eq. 1})$$

The subscripts “x” and “s” refer to the substance under investigation and the reference compound, respectively;  $J = \int I_{\text{FI}}(\lambda) d\lambda$  is the integral of the emission band;  $T$  is the optical transmittance of the sample solution at the excitation wavelength  $\lambda_{\text{ex}}$ ;  $n$  is the refractive index of the sample or standard solution.

**Table S1.** Absorption and emission properties of compound **2b**.

| Solvent            | Absorption                                      |                             | Fluorescence                                   |                                 |
|--------------------|-------------------------------------------------|-----------------------------|------------------------------------------------|---------------------------------|
|                    | $\lambda_{\text{abs}} / \text{nm}^{[\text{a}]}$ | $\lg \epsilon^{[\text{b}]}$ | $\lambda_{\text{FI}} / \text{nm}^{[\text{c}]}$ | $\phi_{\text{FI}}^{[\text{d}]}$ |
| DCM                | 412                                             | 3.95                        | 446                                            | 0.05                            |
| THF                | 411                                             | 3.81                        | 426                                            | <0.01                           |
| DMSO               | 408                                             | 3.99                        | 440                                            | 0.01                            |
| CH <sub>3</sub> CN | 405                                             | 4.00                        | 440                                            | 0.24                            |
| MeOH               | 406                                             | 3.98                        | 440                                            | 0.24                            |
| H <sub>2</sub> O   | 404                                             | 3.98                        | 440                                            | 0.25                            |

<sup>[a]</sup> Long-wavelength absorption maximum. <sup>[b]</sup> Molar extinction coefficient in  $\text{cm}^{-1} \text{M}^{-1}$ . <sup>[c]</sup> Fluorescence maximum,  $\lambda_{\text{ex}} = 366 \text{ nm}$ . <sup>[d]</sup> Relative to anthracene  $\phi_{\text{FI}} = 0.28$  (EtOH,  $\lambda_{\text{ex}} = 340 \text{ nm}$ , Ref. 1).

**Table S2.** Absorption and emission properties of compound **4b**.

| Solvent            | Absorption                                      |                             | Fluorescence                                   |                                 |
|--------------------|-------------------------------------------------|-----------------------------|------------------------------------------------|---------------------------------|
|                    | $\lambda_{\text{abs}} / \text{nm}^{[\text{a}]}$ | $\lg \epsilon^{[\text{b}]}$ | $\lambda_{\text{FI}} / \text{nm}^{[\text{c}]}$ | $\phi_{\text{FI}}^{[\text{d}]}$ |
| DCM                | 416                                             | 4.22                        | 464                                            | <0.01                           |
| DMSO               | 411                                             | 4.27                        | 448                                            | <0.01                           |
| CH <sub>3</sub> CN | 408                                             | 4.24                        | 435                                            | <0.01                           |
| MeOH               | 409                                             | 4.23                        | 433                                            | <0.01                           |
| H <sub>2</sub> O   | 408                                             | 4.06                        | 429                                            | <0.01                           |

<sup>[a]</sup> Long-wavelength absorption maximum. <sup>[b]</sup> Molar extinction coefficient in  $\text{cm}^{-1} \text{M}^{-1}$ . <sup>[c]</sup> Fluorescence maximum  $\lambda_{\text{ex}} = 366 \text{ nm}$ . <sup>[d]</sup> Relative to anthracene  $\phi_{\text{FI}} = 0.28$  (EtOH,  $\lambda_{\text{ex}} = 340 \text{ nm}$ , Ref. 1).



### 3. Photoreactions of **4b**

#### 3.1 Photometric monitoring of the photoreaction of **4b** and thermal stability of the photoproduct

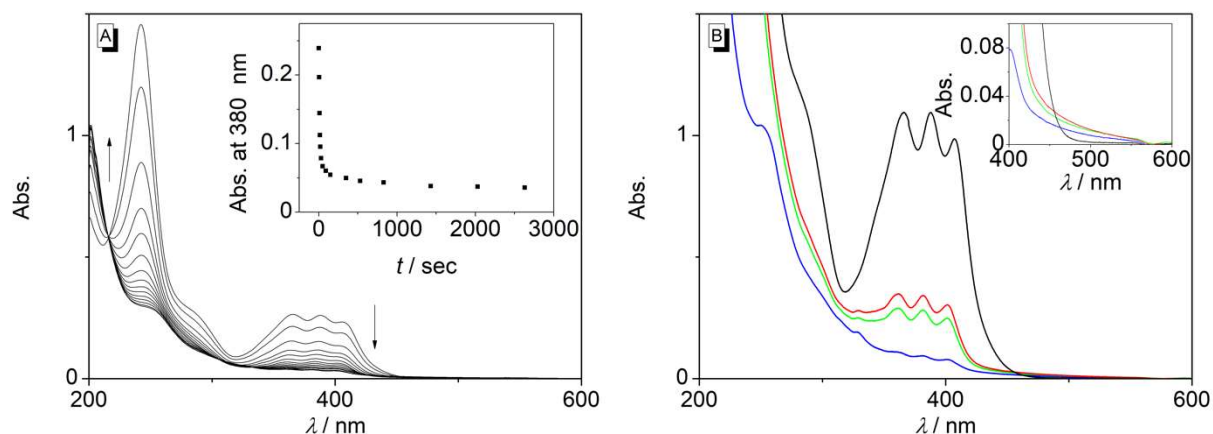

**Figure S23.** A: Photometric monitoring of the photoreaction of **4b** in H<sub>2</sub>O ( $c = 20 \mu\text{M}$ ) with  $\lambda_{\text{ex}} = 365 \text{ nm}$ . B: Photometric monitoring of the photoreaction of **4b** in H<sub>2</sub>O ( $c = 80 \mu\text{M}$ ) with  $\lambda_{\text{ex}} = 365 \text{ nm}$  at  $t = 0 \text{ s}$  (black) and  $t = 90 \text{ min}$  (blue) and further irradiation with  $\lambda_{\text{ex}} = 310 \text{ nm}$  at  $t = 5 \text{ min}$  (green) and  $t = 15 \text{ min}$  (blue). Inset A: Change of absorbance at the long wavelength absorption maximum during irradiation. Inset B: Magnification of the absorbance at 400–600 nm.

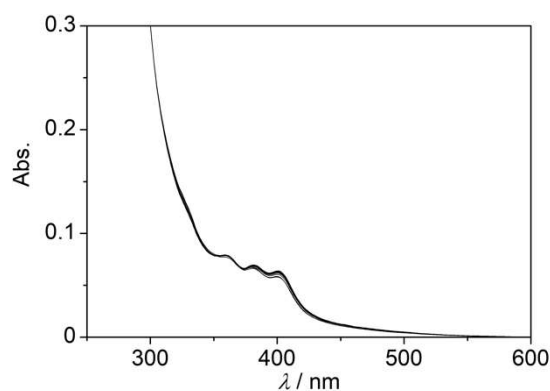

**Figure S24.** Photometric monitoring of **4b<sup>shh</sup>** and **c4b<sup>shh</sup>** ( $c = 40 \mu\text{M}$ , derived from irradiation of **4b** with  $\lambda_{\text{ex}} = 365 \text{ nm}$ ,  $t = 30 \text{ min}$ ) in PBS solution (pH = 7.0) in the presence of DNA ( $c = 160 \mu\text{M}$ ) at 37 °C for 16 h.

#### 3.2 NMR-spectroscopic analysis of the photoreaction

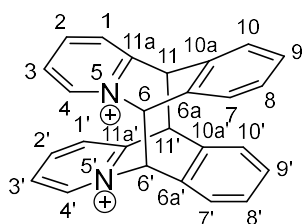

**Figure S25.** General numbering of the photodimer of benzo[*b*]quinolizinium (**1**).

A solution of **4b** (1.6 mg, 2.6  $\mu$ mol) in D<sub>2</sub>O (500  $\mu$ L) was irradiated in a NMR tube ( $\lambda_{\text{exc}}$  = 365 nm) for 13 min.

**4b<sup>ahh</sup>:**

<sup>1</sup>H-NMR (600 MHz, D<sub>2</sub>O, 40 °C):  $\delta$  = 4.11, 4.36 [AB system, <sup>2</sup>*J* = 15 Hz, 4H, 2  $\times$  C7-CH<sub>2</sub>], 5.78 (s, 2H, 2  $\times$  11-H), 7.17 (dd, <sup>3</sup>*J* = 7 Hz, <sup>4</sup>*J* = 2 Hz, 2H, 2  $\times$  10-H), 7.20–7.26 (m, 4H, 2  $\times$  8-, 2  $\times$  9-H), 7.40 (s, 2H, 2  $\times$  6-H), 7.87–7.93 (m, 2H, 2  $\times$  3-H), 8.17 (d, <sup>3</sup>*J* = 8 Hz, 2H, 2  $\times$  1-H), 8.50 (ddd, <sup>3</sup>*J* = 9 Hz, <sup>3</sup>*J* = 8 Hz, <sup>4</sup>*J* = 1 Hz, 2H, 2  $\times$  2-H), 9.07 (d, <sup>3</sup>*J* = 6 Hz, 2H, 2  $\times$  4-H). – <sup>13</sup>C NMR (150 MHz, D<sub>2</sub>O, 40 °C):  $\delta$  = 36.0 (2  $\times$  C7-CH<sub>2</sub>), 52.6 (2  $\times$  C11), 72.1 (2  $\times$  C6), 130.2 (2  $\times$  C3), 130.4 (2  $\times$  C9, 2  $\times$  C10), 131.7 (2  $\times$  C1), 132.9 (2  $\times$  C8), 133.8 (2  $\times$  C6a), 135.1 (2  $\times$  C10a), 139.7 (2  $\times$  C7), 148.7 (2  $\times$  C4), 151.6 (2  $\times$  C2), 157.7 (2  $\times$  C11a).

**4b<sup>shh</sup>:**

<sup>1</sup>H-NMR (600 MHz, D<sub>2</sub>O, 40 °C):  $\delta$  = 4.00, 4.17 [AB system, <sup>2</sup>*J* = 15 Hz, 4H, 2  $\times$  C7-CH<sub>2</sub>], 5.85 (s, 2H, 2  $\times$  11-H), 7.12 (d, <sup>3</sup>*J* = 8 Hz, 2H, 2  $\times$  8-H), 7.20–7.26 (m, 2H, 2  $\times$  9-H), 7.35 (d, <sup>3</sup>*J* = 8 Hz, 2H, 2  $\times$  10-H), 7.50 (s, 2H, 2  $\times$  6-H), 7.87–7.93 (m, 2H, 2  $\times$  3-H), 8.14 (d, <sup>3</sup>*J* = 8 Hz, 2H, 2  $\times$  1-H), 8.48 (td, <sup>3</sup>*J* = 8 Hz, <sup>4</sup>*J* = 1 Hz, 2H, 2  $\times$  2-H), 9.21 (d, <sup>3</sup>*J* = 6 Hz, 2H, 2  $\times$  4-H). – <sup>13</sup>C NMR (150 MHz, D<sub>2</sub>O, 40 °C):  $\delta$  = 36.0 (2  $\times$  C7-CH<sub>2</sub>), 52.8 (2  $\times$  C11), 73.3 (not visible in <sup>13</sup>C-NMR spectrum, but visible in HMBC, 2  $\times$  C6), 130.1 (2  $\times$  C3), 131.4 (not visible in <sup>13</sup>C-NMR spectrum, but visible in HSQC experiment, 2  $\times$  C10), 131.6 (2  $\times$  C1), 134.0 (2  $\times$  C9), 134.4 (not visible in <sup>13</sup>C-NMR spectrum, but visible in HMBC experiment, 2  $\times$  C8), 137.5 (2  $\times$  C10a), 148.8 (2  $\times$  C4), 151.4 (2  $\times$  C2), 157.6 (2  $\times$  C11a). Comment: No <sup>13</sup>C-NMR signal could be assigned to C7' and C6a'. – HRMS (ESI<sup>+</sup>): Calcd for: [C<sub>28</sub>H<sub>22</sub>N<sub>2</sub>S<sub>2</sub>]<sup>2+</sup> *m/z* = 225.0607, found: 225.0608 [M].

#### 4. Thioester cleavage of **2b** by esterase

A solution of **2b** (*c* = 20  $\mu$ M) in PBS solution (pH = 7.80) was treated with esterase from porcine liver (400  $\mu$ g, 7.6 units) for 22 h at 37 °C, and the reaction was followed photometrically by measuring an absorption spectrum every 20 min (*cf.* main manuscript, Figure S24).

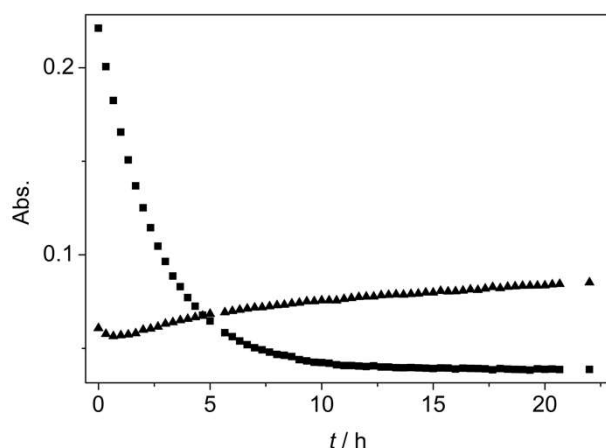

**Figure S26.** A2: Photometric monitoring of the reaction of **2b** ( $c = 20 \mu\text{M}$ ) with esterase (400  $\mu\text{g}$ , 7.6 Units) for 22 h at 37 °C in PBS solution (pH = 7.80) presented as plot of absorption at 403 nm (squares) and 323 nm (triangles) versus  $t$ .

## 5. DNA-binding studies

### 5.1 Photometric and fluorimetric titrations

To solutions of **2b** ( $\lambda_{\text{ex}} = 412 \text{ nm}$ ), **4b** ( $\lambda_{\text{ex}} = 365 \text{ nm}$ ), **6** ( $\lambda_{\text{ex}} = 335 \text{ nm}$ ), and **c4b<sup>shh</sup>** ( $\lambda_{\text{ex}} = 360 \text{ nm}$ ) ( $c = 20 \mu\text{M}$ ) in BPE buffer (pH = 7.00) were added aliquots of a ct DNA stock solution, and the respective absorption and emission spectra (Figure S25) were recorded after an equilibration time of 3 min. The titration was stopped when at least four equivalents of DNA were added, or no more significant changes were observed during photometric titrations upon addition of DNA.

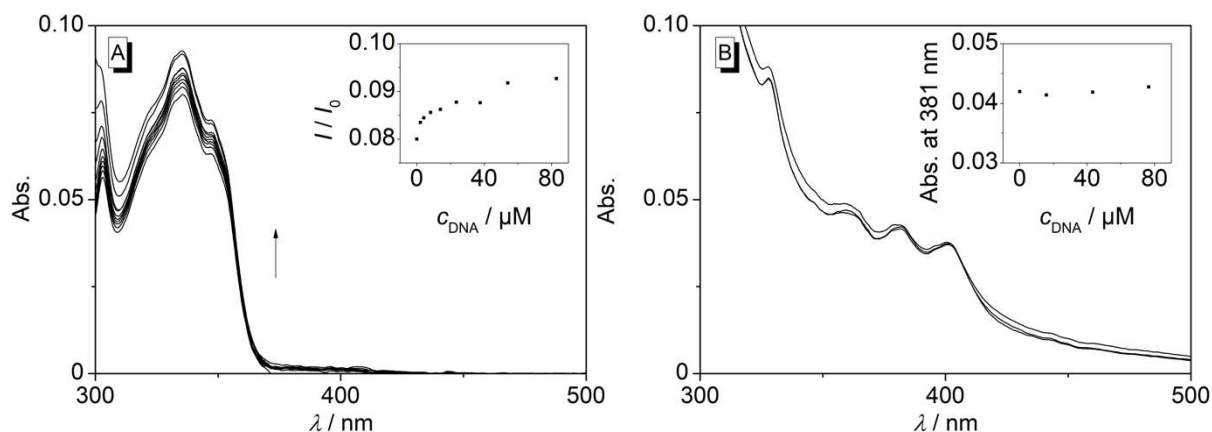

**Figure S27.** Photometric titrations of **6** (A) and **c4b<sup>shh</sup>** and **c4b<sup>ahh</sup>** (B) ( $c = 20 \mu\text{M}$ ) with ct DNA in bisphosphate EDTA (BPE) buffer (pH = 7.00); The arrows indicate the change of the absorption bands during titration. Insets: Plots of the changes of absorption or fluorescence upon addition of DNA.

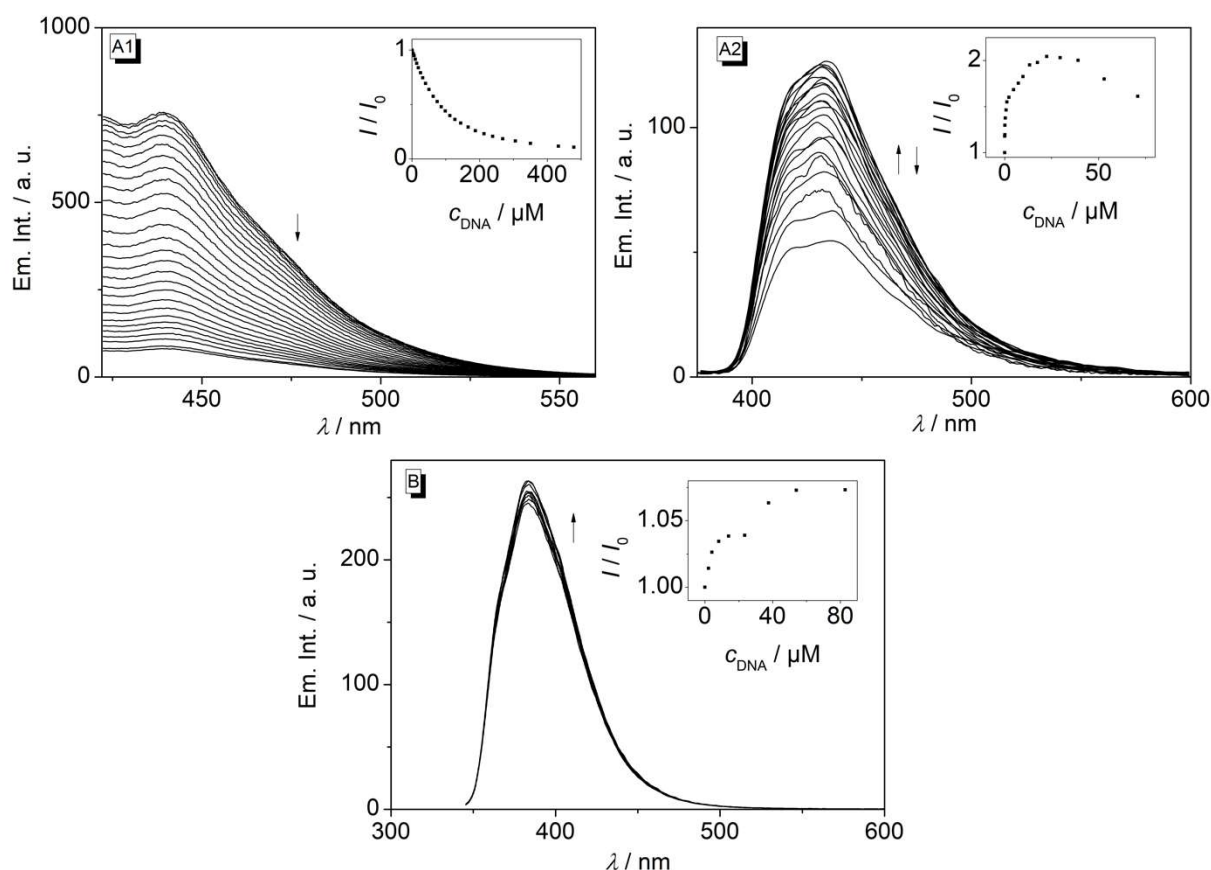

**Figure S28.** Fluorimetric titrations of **2b** (A1,  $\lambda_{\text{ex}} = 412$  nm), **4b** (A2,  $\lambda_{\text{ex}} = 365$  nm), **6** (1,  $\lambda_{\text{ex}} = 335$  nm), with ct DNA in BPE buffer ( $c_{\text{ligand}} = 20$   $\mu\text{M}$ , pH = 7.00). The arrows indicate the change of the fluorescence from the first to the last titration step. Insets: Plot of the change of fluorescence intensity versus  $c_{\text{DNA}}$ .

## 5.2 Fluorescent indicator displacement (FID) assay

For compound **4b** a fluorescent indicator displacement (FID) experiment with thiazol orange (**TO**) was performed according to known procedure.<sup>Fehler! Textmarke nicht definiert.</sup> To a solution of **TO** (0.5  $\mu\text{M}$ ) and ct DNA (0.25  $\mu\text{M}$ ) in BPE buffer (pH = 7.00) were added aliquots of a stock solution of **4b** ( $c = 50$   $\mu\text{M}$ ), in BPE buffer, and the fluorescence ( $\lambda_{\text{ex}} = 475$  nm) was recorded after an equilibration time of 3 min. The percentage displacement (PD) of **TO** and the PD50 value (PD = 50%) were calculated according to equation 2.

$$\text{PD} = 100 - \left( \frac{\text{FA}}{\text{FA}_0} \times 100 \right) \quad (\text{eq. 2})$$

The variable FA refers to the fluorescence area (500–750 nm) at the respective titration step and  $\text{FA}_0$  refers to the fluorescence area before the addition of the ligand.

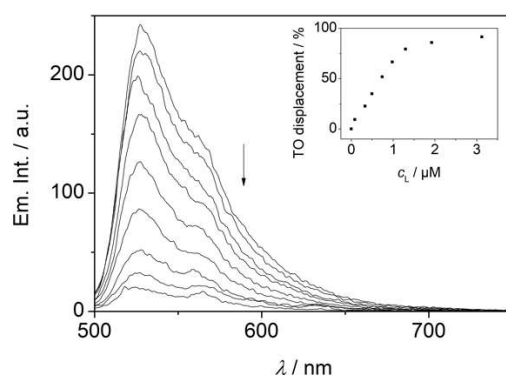

**Figure S29.** Changes of the fluorescence spectra ( $\lambda_{\text{ex}} = 475 \text{ nm}$ ) of **TO** ( $0.5 \mu\text{M}$ ) bound to DNA ( $0.25 \mu\text{M}$ ) upon addition of **4b** in BPE buffer ( $\text{pH} = 7.00$ ). The arrow indicates the change of the fluorescence from the first to the last titration step. Inset: **TO** displacement versus concentration of the added ligand.

### 5.3 CD- and LD-spectroscopic analysis

Solutions of ct DNA ( $c = 50 \mu\text{M}$ ) with different concentrations of **2b**, **4b**, **6**, or **c4b<sup>shh</sup>** and **c4b<sup>ahh</sup>** in BPE buffer ( $\text{pH} = 7.0$ ) were prepared and analyzed by CD (Figure S27) and LD spectroscopy (Figure S28). The solutions of the photoproduct of **2b** were prepared by irradiation of solutions of **2b** ( $\lambda_{\text{ex}} = 365 \text{ nm}$ ,  $t = 3 \text{ min}$ ) prior to the addition of DNA.

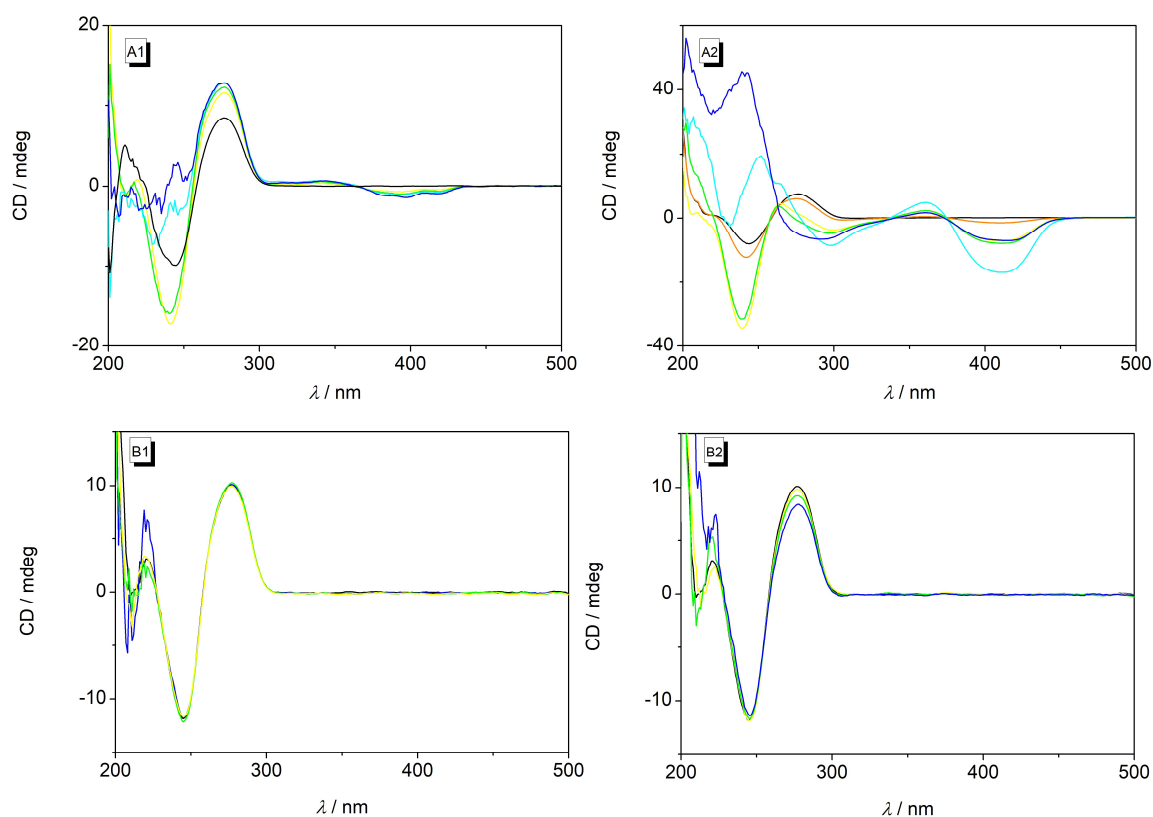

**Figure S30.** CD spectra of **2b** (A1), **4b** (A2), **6** (B1), and **c4b<sup>shh</sup>** and **c4b<sup>ahh</sup>** (B2) in BPE buffer ( $\text{pH} = 7.00$ ) with ct DNA ( $c = 50 \mu\text{M}$ ) at different ligand-DNA ratios [LDR = 0 (black), 0.1 (orange), 0.5 (yellow), 1.0 (green), 1.5 (cyan), 2.0 (blue)].

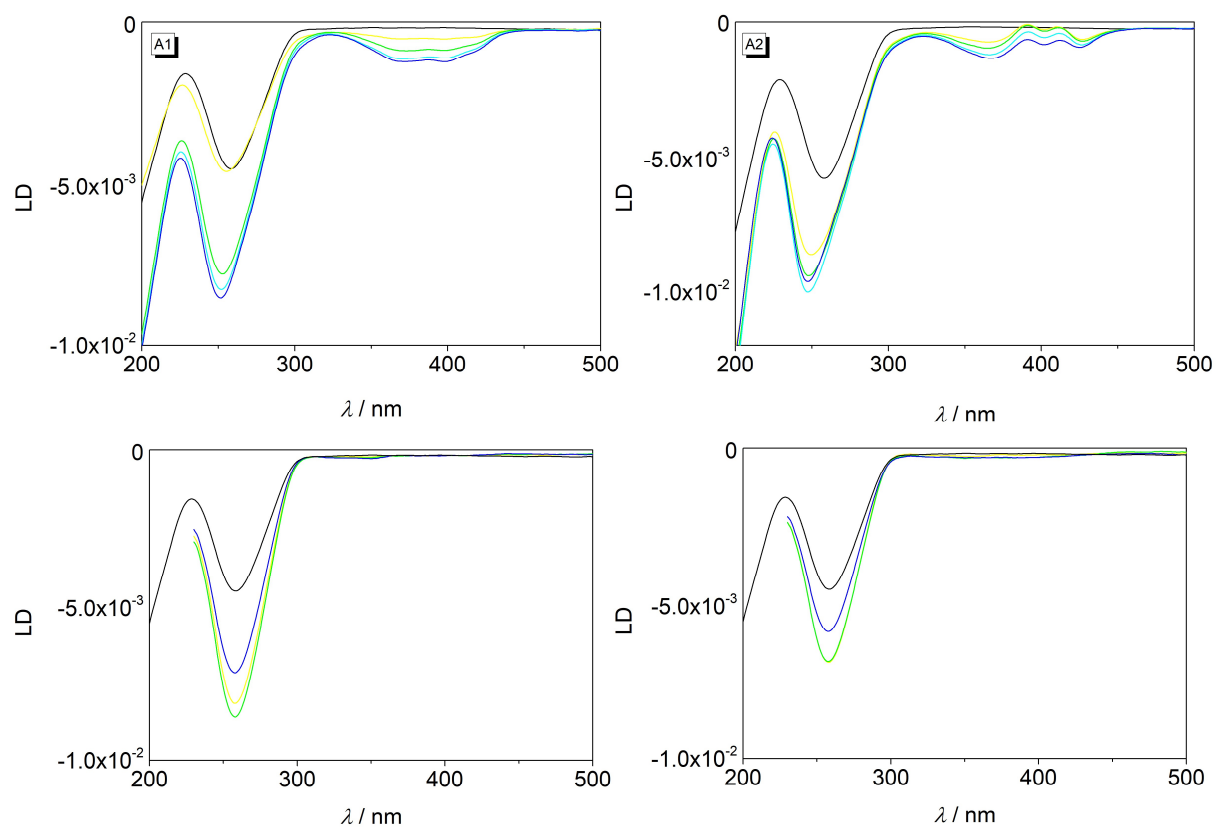

**Figure S31.** LD spectra of **2b** (A1), **4b** (A2), **6** (B1), and **c4b<sup>shh</sup>** and **c4b<sup>ahh</sup>** (B2) in BPE buffer (pH = 7.00) with ct DNA ( $c = 50 \mu\text{M}$ ) at different ligand-DNA ratios [LDR = 0 (black), 0.1 (orange), 0.5 (yellow), 1.0 (green), 1.5 (cyan), 2.0 (blue)].

## 5.4 Determination of binding constants

The binding constants were determined by fitting of the respective saturation fraction (SF, eq. 3) calculated from the photometric titrations according to literature protocol (eq. 4).<sup>2</sup>

$$SF = \frac{Abs_n - Abs_0}{Abs_s - Abs_0} \quad (\text{eq. 3})$$

The variable  $Abs_n$  is the absorption at the titration step  $n$ ,  $Abs_0$  is the absorption with  $n = 0$  and  $Abs_s$  is the absorption when all ligands are bound to the DNA (assessed by analysis of photometric data, often last titration step).

$$y = \frac{1}{2} R (A + B + x - \sqrt{(((A + B + x)^2) - (4Bx))}) \quad (\text{eq. 4})$$

The variable  $R$  refers to an instrumental response sensitivity dependent variable,  $A$  is the reciprocal binding constant  $K_b$ ,  $B$  is a dependent variable and is equal to the concentration of the ligand or the DNA (equal to ligand concentration if DNA is added to the ligand and vice versa).

**Table S3.** Parameters of the fit of experimental titration data to the theoretical Model (eq. 4, Figure S31).

| Ligand                   | A <sup>[d]</sup>      | B <sup>[e]</sup>      | R <sup>[f]</sup>   |
|--------------------------|-----------------------|-----------------------|--------------------|
| <b>4b</b> <sup>[a]</sup> | $1.63 \times 10^{-6}$ | $5.00 \times 10^{-5}$ | $2.03 \times 10^4$ |
| <b>2b</b> <sup>[b]</sup> | $4.95 \times 10^{-5}$ | $6.00 \times 10^{-5}$ | $1.88 \times 10^4$ |
| <b>2b</b> <sup>[c]</sup> | $5.07 \times 10^{-5}$ | $6.00 \times 10^{-5}$ | $1.87 \times 10^4$ |

<sup>[a]</sup> Derived from polarimetric DNA titration (CD spectroscopy). <sup>[b]</sup> Derived from photometric titration. <sup>[c]</sup> <sup>[d]</sup> Dependent variable  $A = K_b^{-1}$ . <sup>[e]</sup> Independent variable, fixed according to concentration of the ligand/DNA and theoretically available binding sites. <sup>[f]</sup> Dependent instrumental response sensitivity variable.

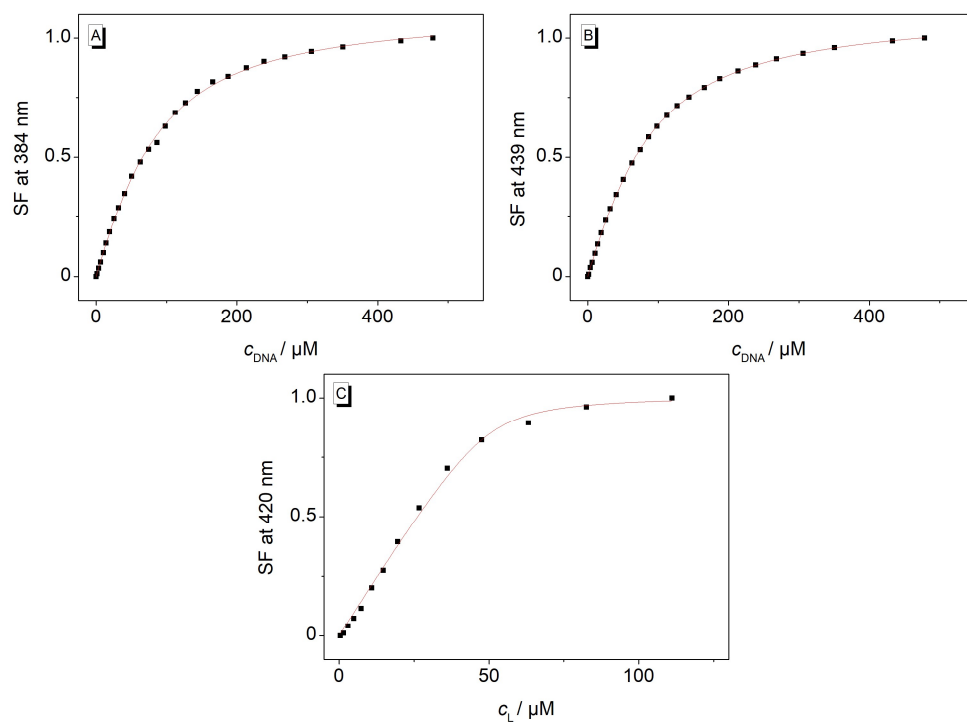

**Figure S32.** Plot of saturation fraction versus DNA concentration  $c_{\text{DNA}}$  (A, B) or versus ligand concentration  $c_{\text{L}}$  (C) and the resulting binding isotherms of **2b** (A, photometric, B, fluorimetric) and **4b** (C, polarimetric) from corresponding Levenberg–Marquardt least-square fitting curves Ref. 2 of the respective spectroscopic titration approach.



## 6. NMR spectra of 2b, 3b, 4b and 6

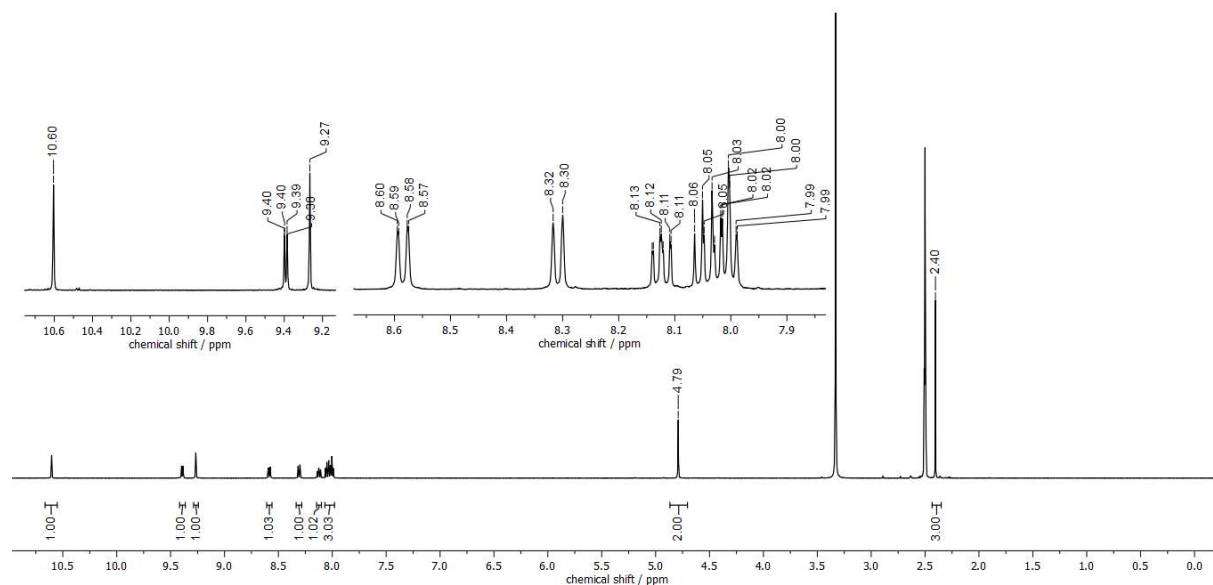

**Figure S33.** <sup>1</sup>H-NMR spectrum (500 MHz, DMSO-*d*<sub>6</sub>, 25 °C) of **2b**.

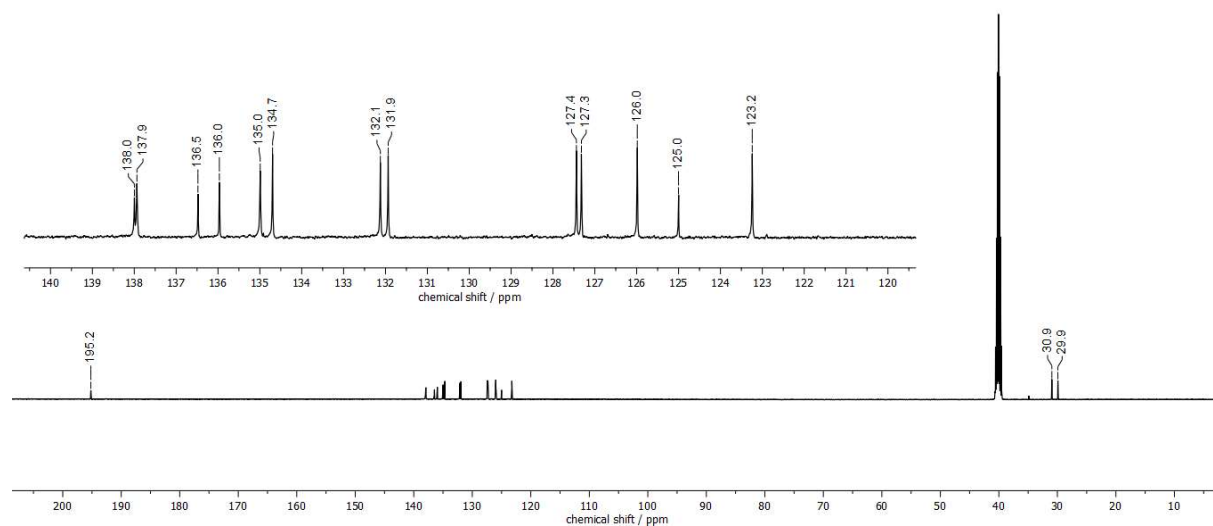

**Figure S34.** <sup>13</sup>C-NMR spectrum (500 MHz, DMSO-*d*<sub>6</sub>, 25 °C) of **2b**.

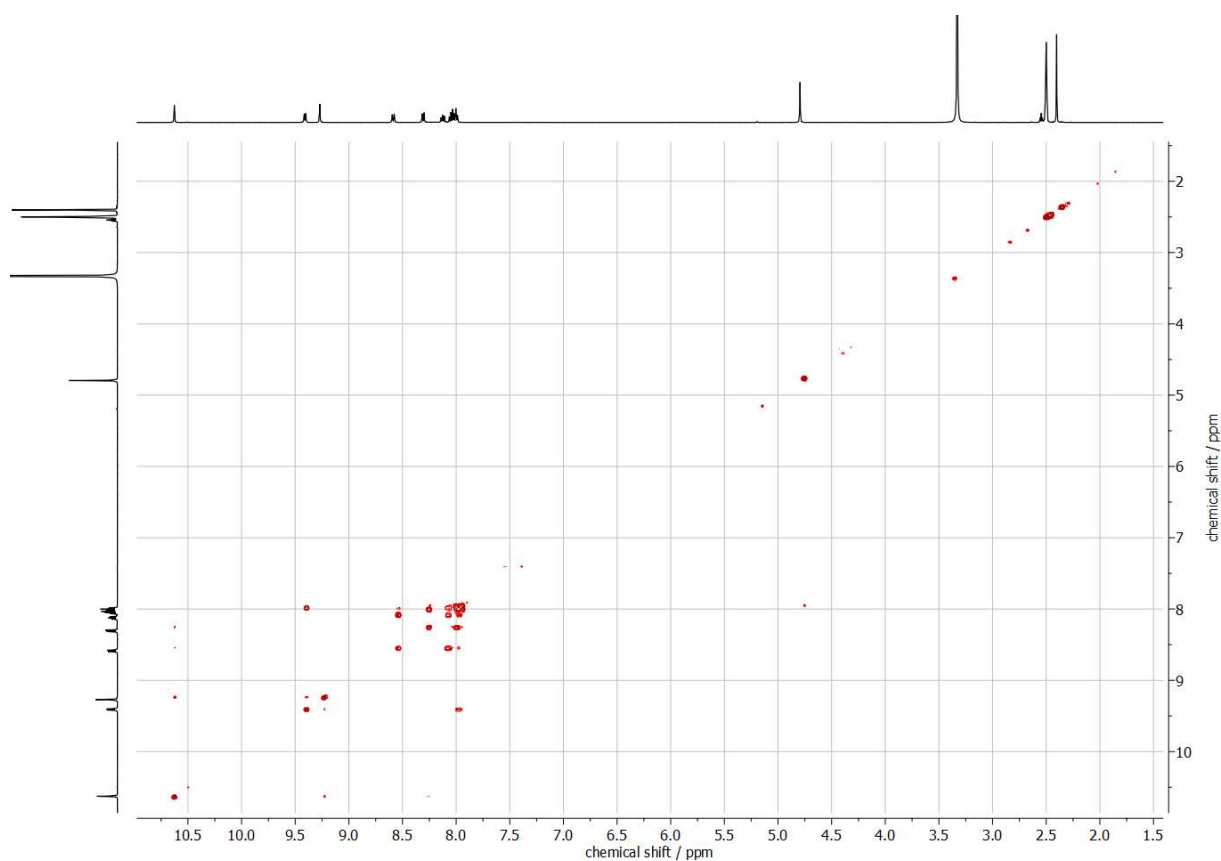

**Figure S35.** HH-COSY spectrum (500 MHz, DMSO- $d_6$ , 25 °C) of **2b**.

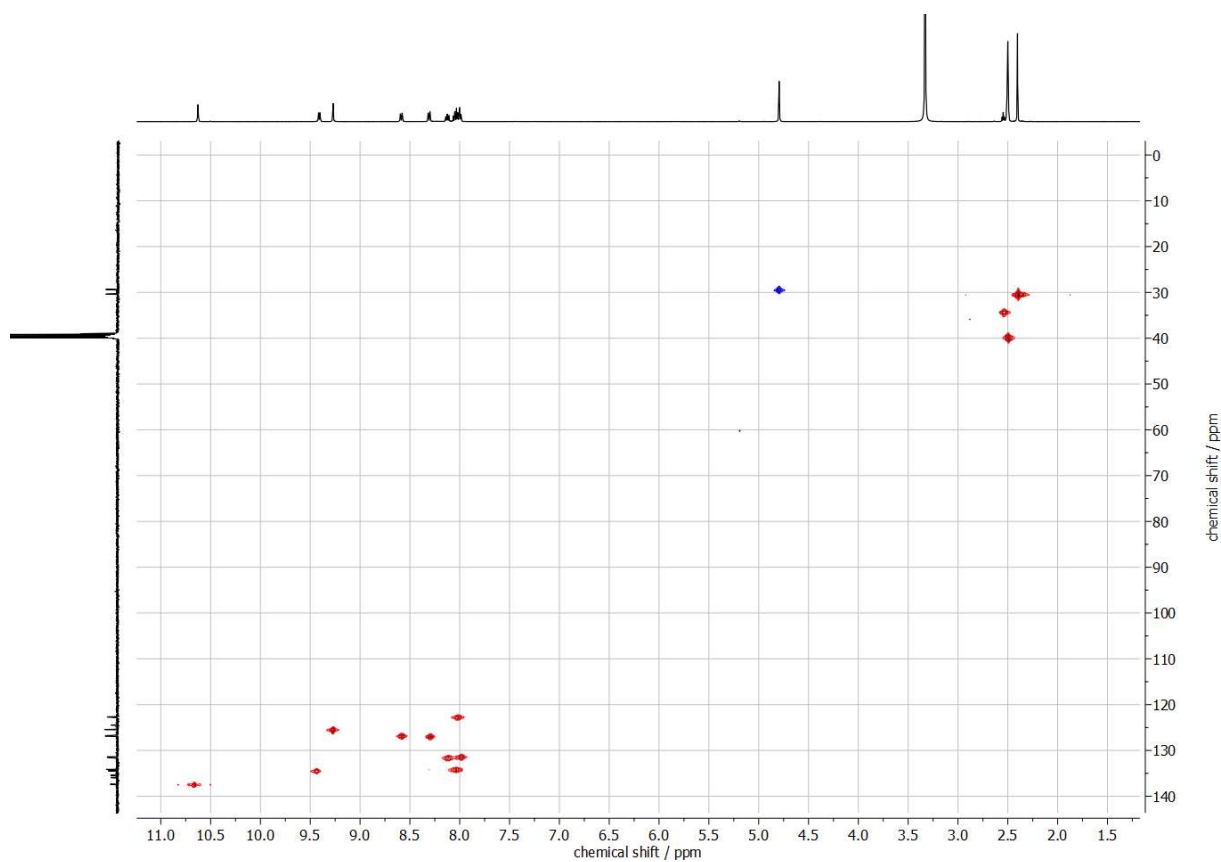

**Figure S36.** HSQC spectrum (500 MHz, DMSO- $d_6$ , 25 °C) of **2b**.

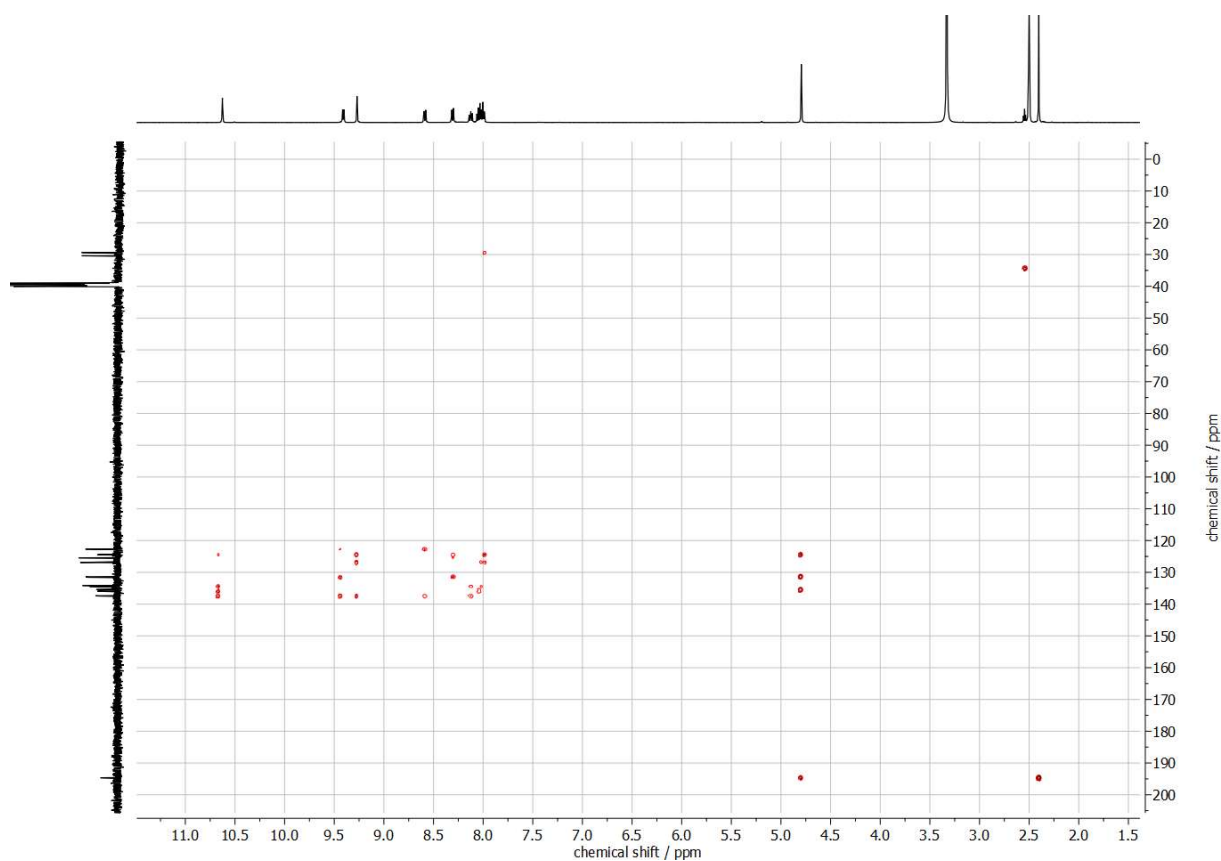

**Figure S37.** HMBC spectrum (500 MHz, DMSO- $d_6$ , 25 °C) of **2b**.

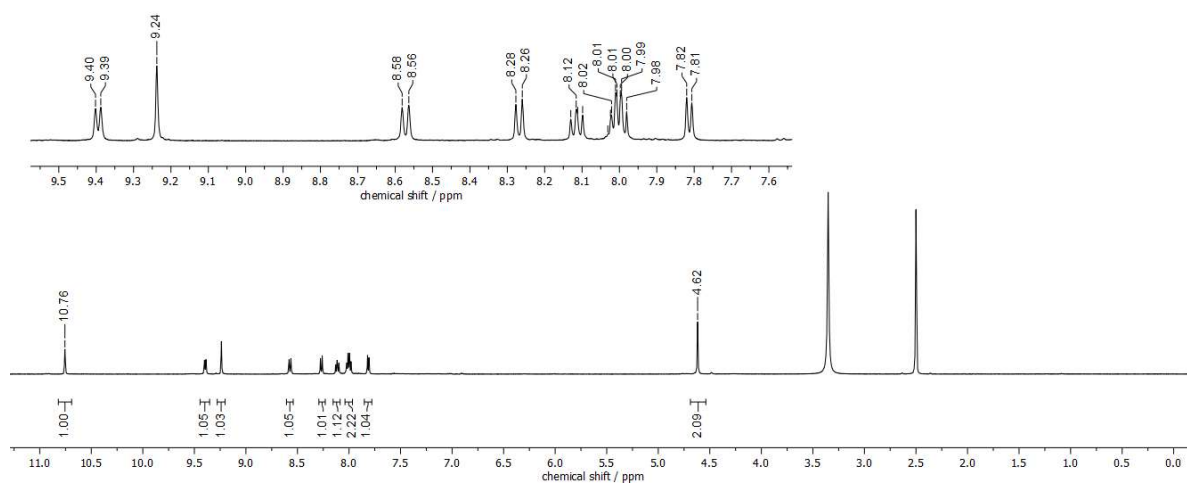

**Figure S38.**  $^1\text{H}$ -NMR spectrum (500 MHz, DMSO- $d_6$ , 25 °C) of **4b**.

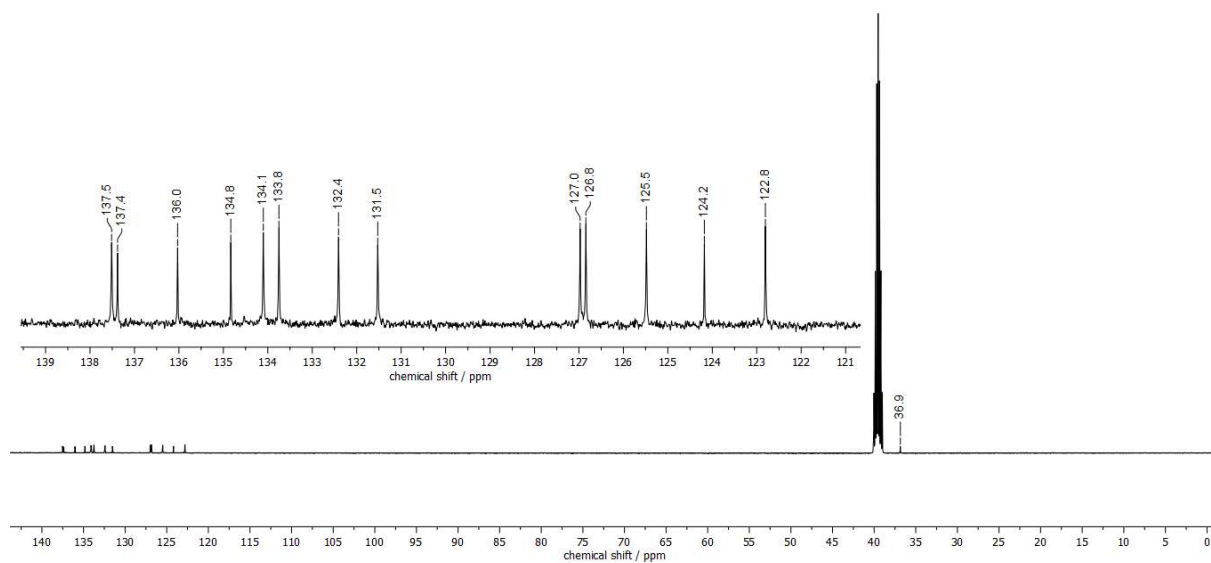

**Figure S39.** <sup>13</sup>C-NMR spectrum (500 MHz, DMSO-*d*<sub>6</sub>, 25 °C) of **4b**.

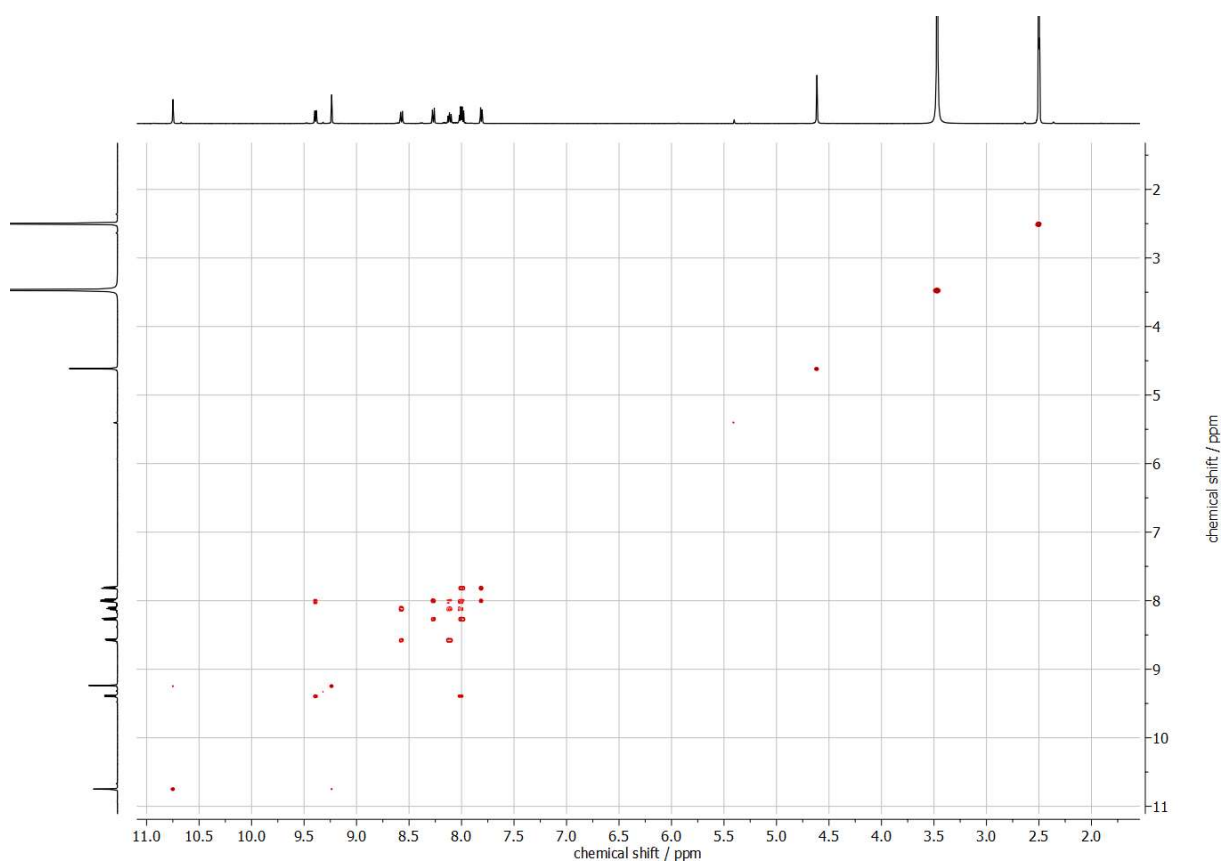

**Figure S40.** HH-COSY spectrum (500 MHz, DMSO-*d*<sub>6</sub>, 25 °C) of **4b**.

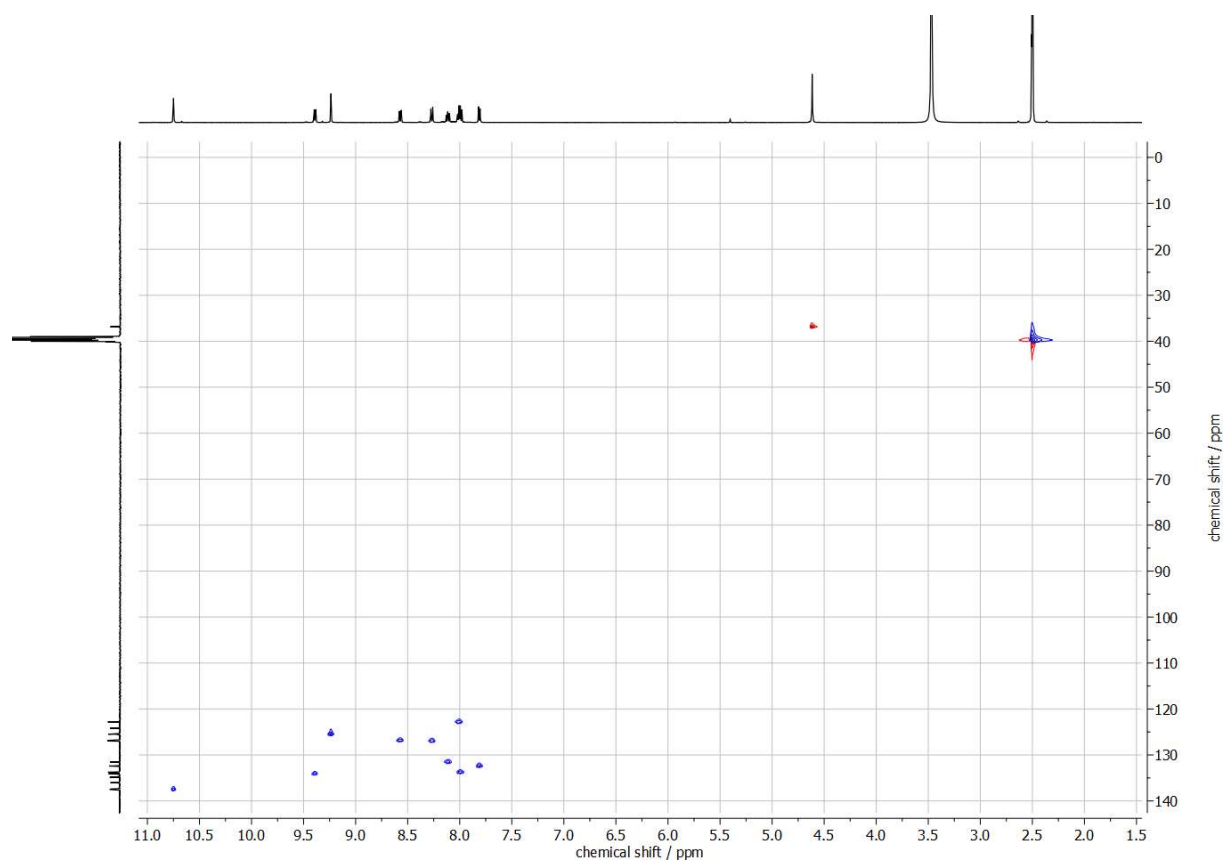

**Figure S41.** HSQC spectrum (500 MHz, DMSO- $d_6$ , 25 °C) of **4b**.

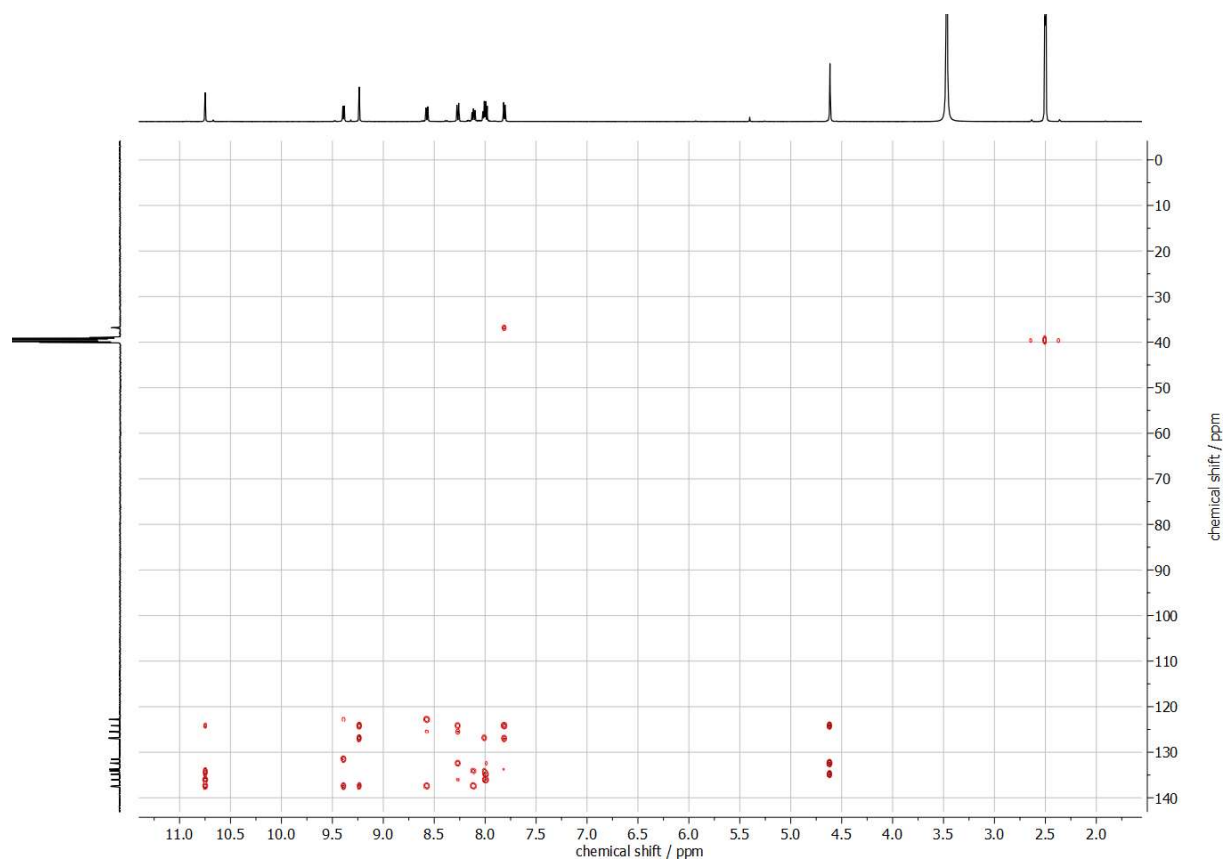

**Figure S42.** HMBC spectrum (500 MHz, DMSO- $d_6$ , 25 °C) of **4b**.

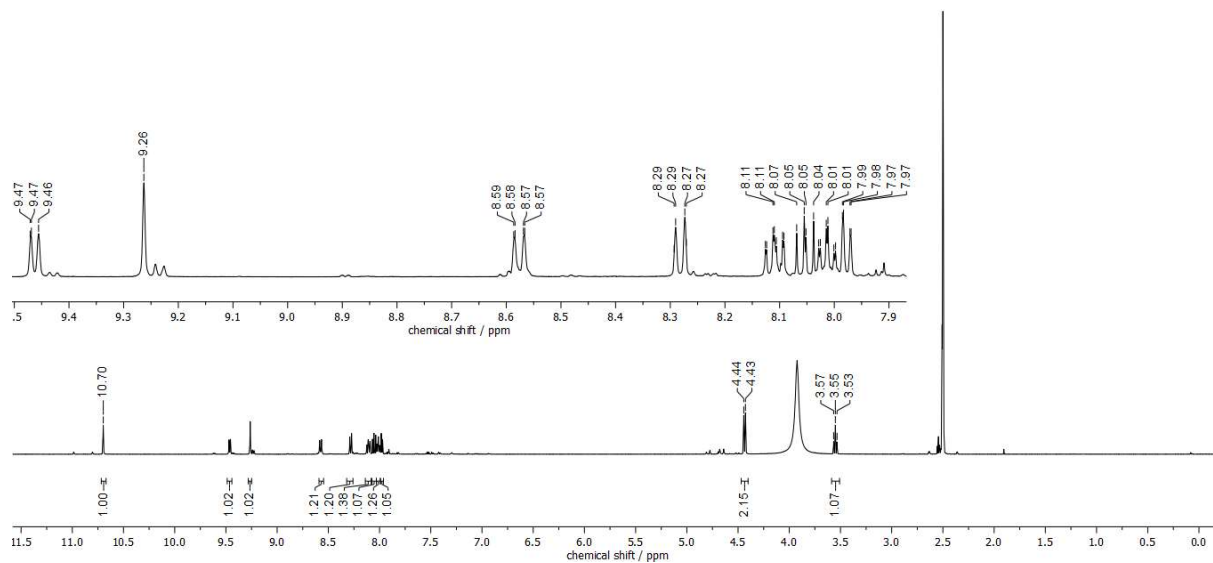

**Figure S43.** Crude  $^1\text{H}$ -NMR spectrum (500 MHz,  $\text{DMSO}-d_6$ , 25  $^\circ\text{C}$ ) of metastable **3b**.

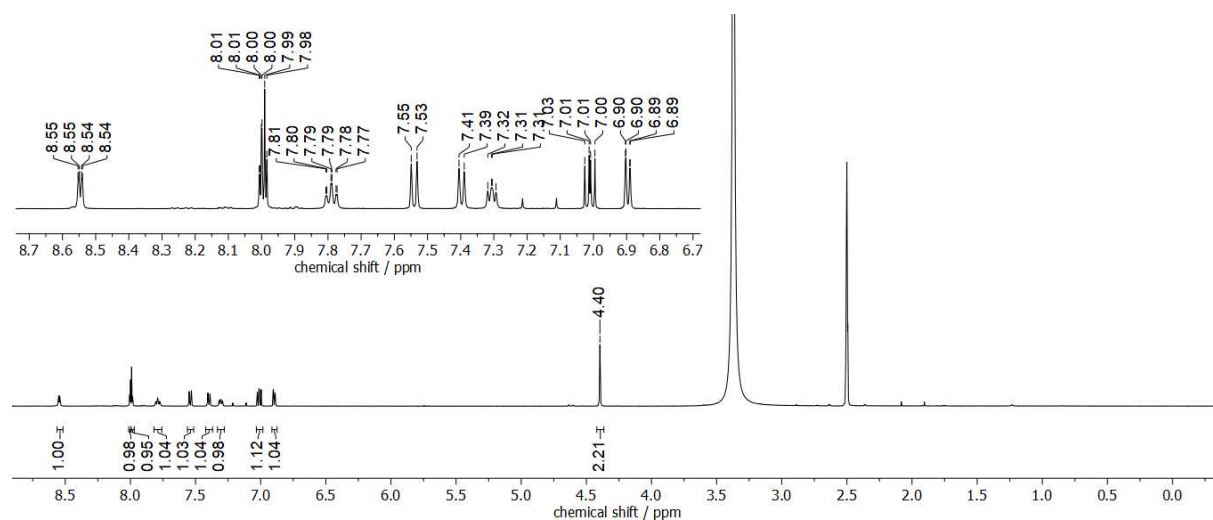

**Figure S44.**  $^1\text{H}$ -NMR spectrum (500 MHz,  $\text{DMSO}-d_6$ , 25  $^\circ\text{C}$ ) of **6-H<sup>+</sup>**.

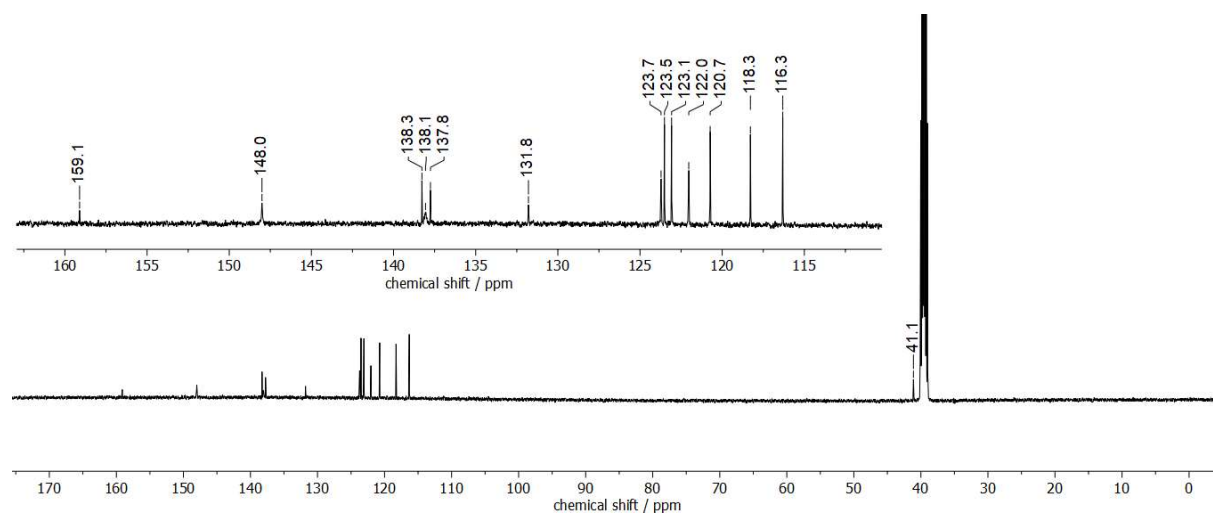

**Figure S45.**  $^{13}\text{C}$ -NMR spectrum (125 MHz,  $\text{DMSO}-d_6$ , 25  $^\circ\text{C}$ ) of **6-H<sup>+</sup>**.

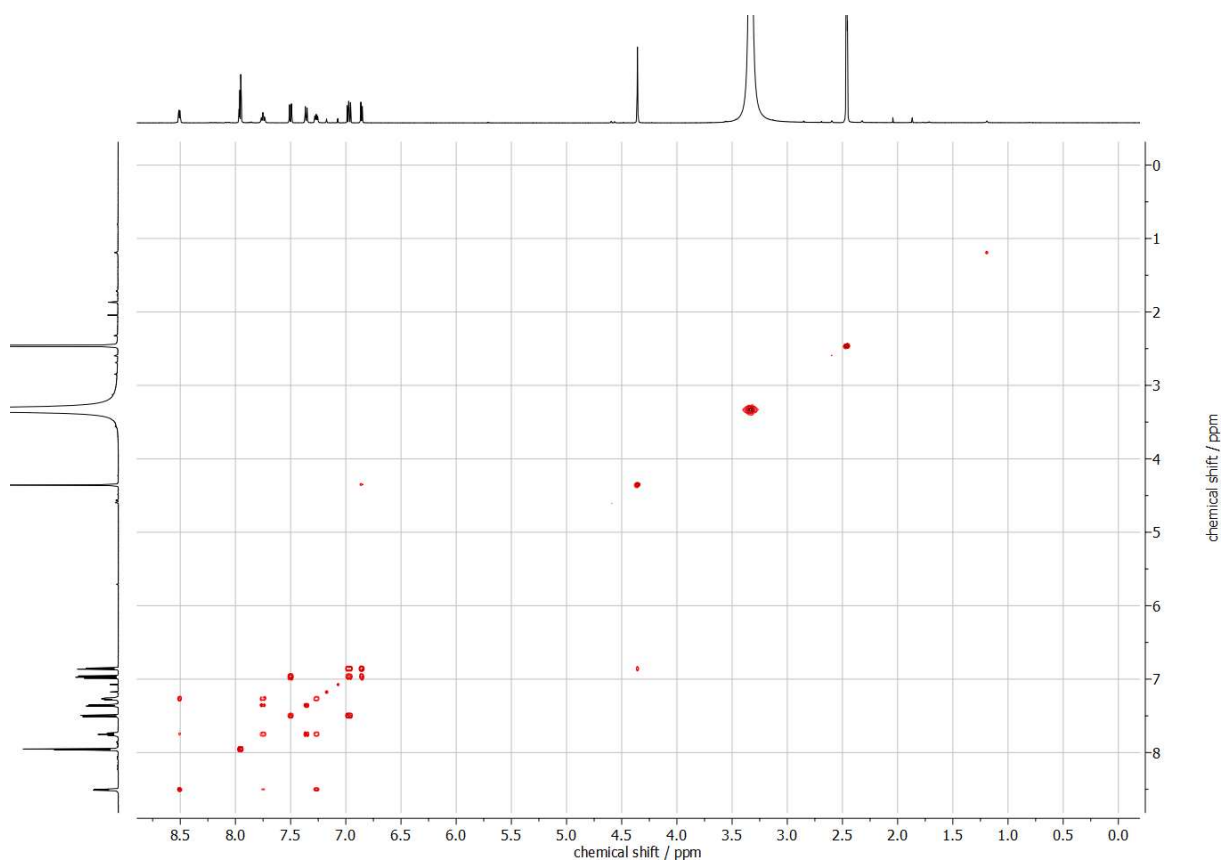

**Figure S46.** HH-COSY spectrum (500 MHz, DMSO- $d_6$ , 25 °C) of **6-H<sup>+</sup>**.

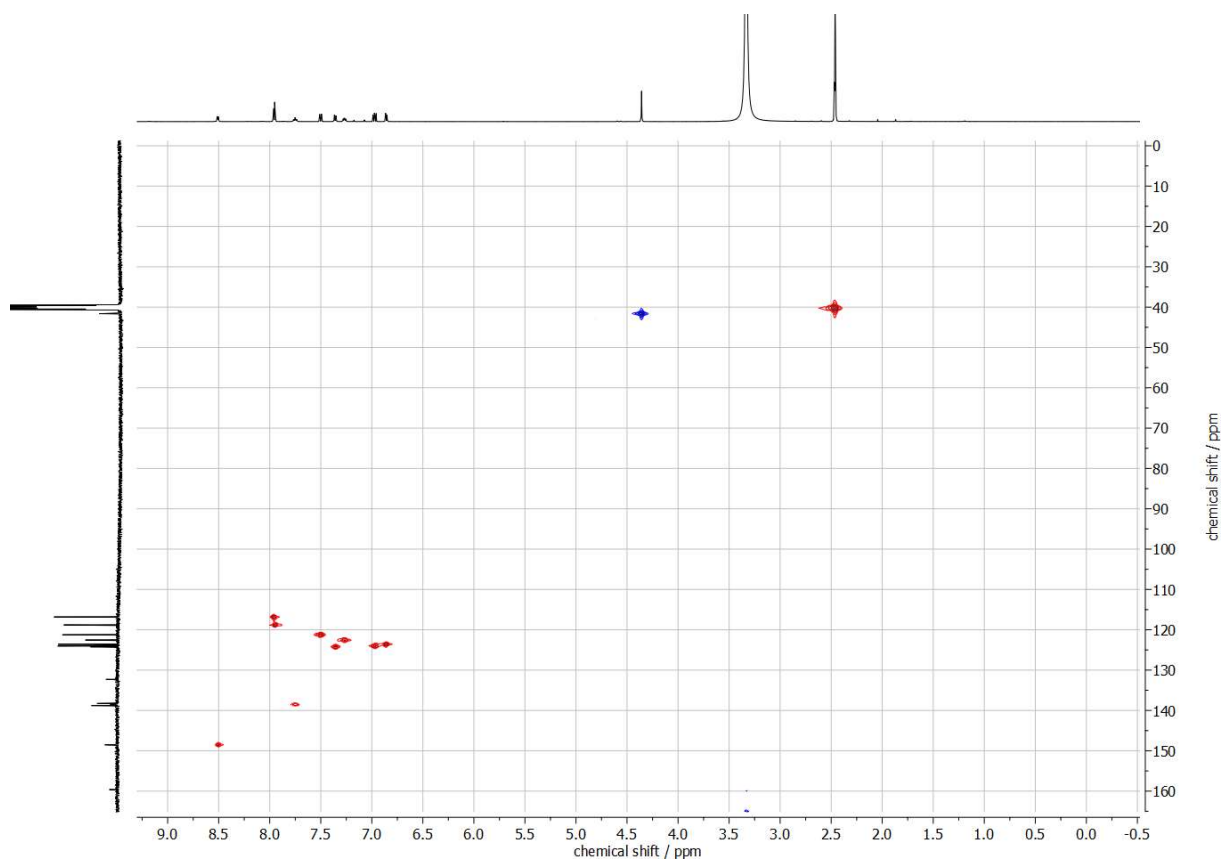

**Figure S47.** HSQC spectrum (500 MHz, DMSO- $d_6$ , 25 °C) of **6-H<sup>+</sup>**.





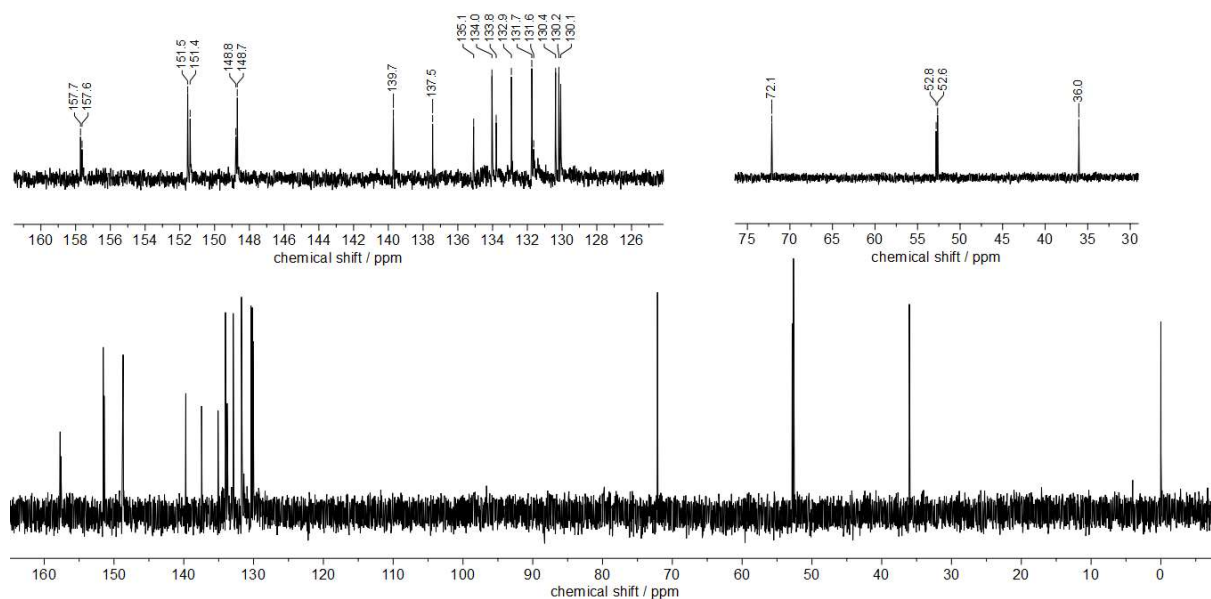

**Figure S50.**  $^{13}\text{C}$ -NMR spectrum (125 MHz,  $\text{D}_2\text{O}$ , 40 °C) of the photolysate of **4b**.

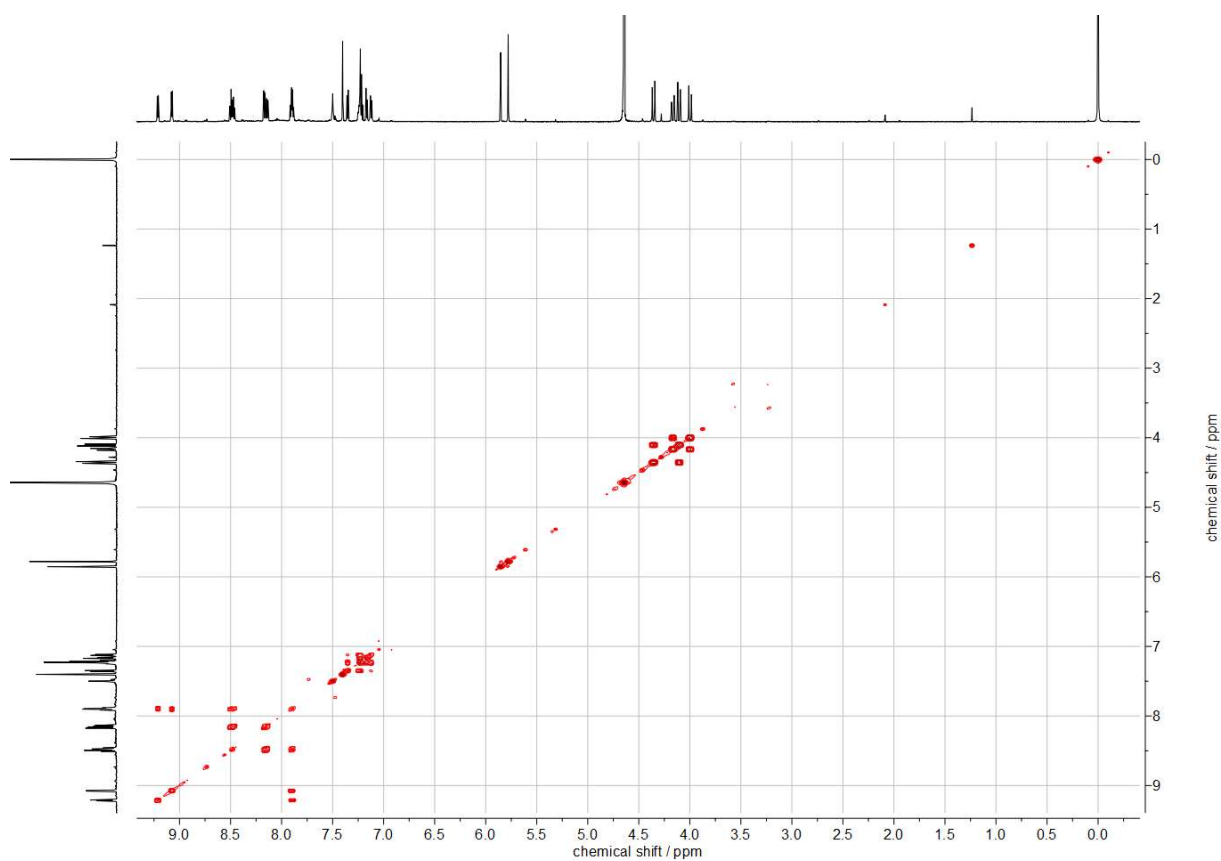

**Figure S51.** HH-COSY spectrum (600 MHz,  $\text{D}_2\text{O}$ , 40 °C) of the photolysate of **4b**.

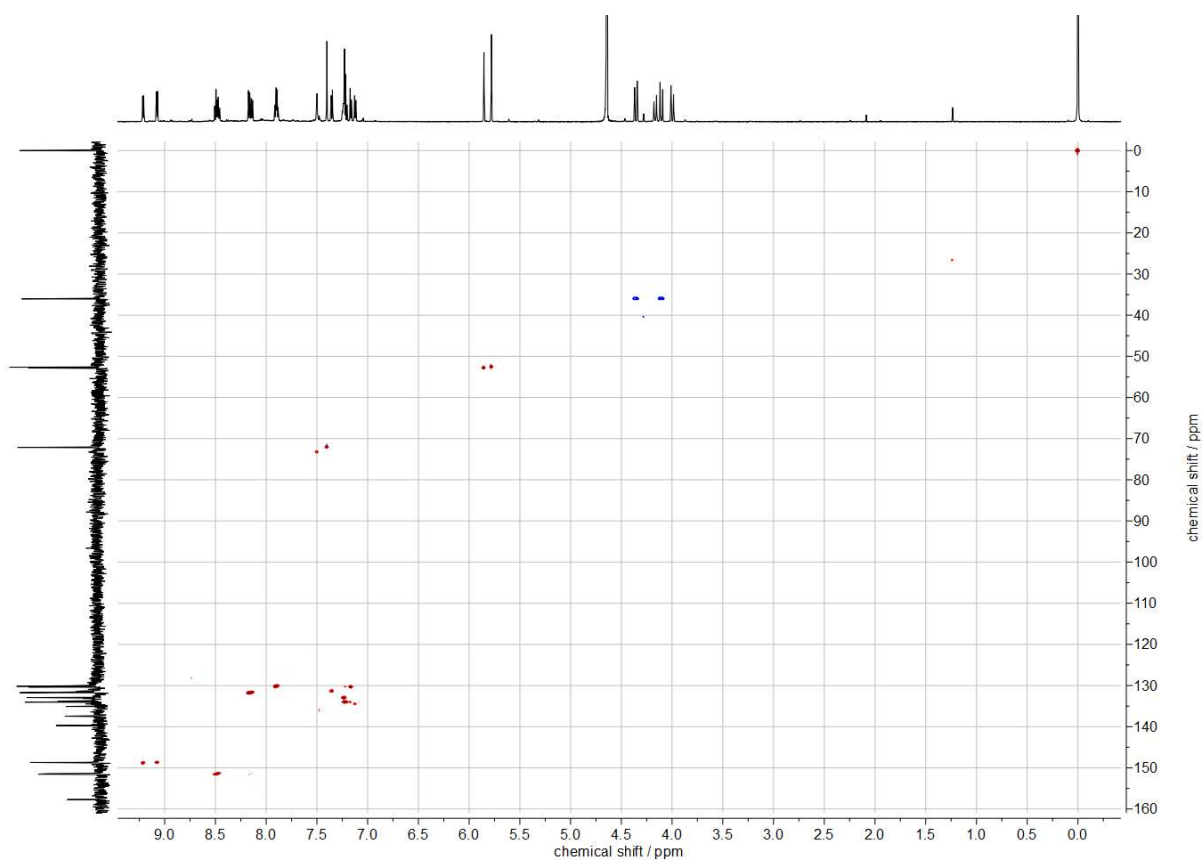

**Figure S52.** HSQC spectrum (600 MHz, D<sub>2</sub>O, 40 °C) of the photolysate of **4b**.

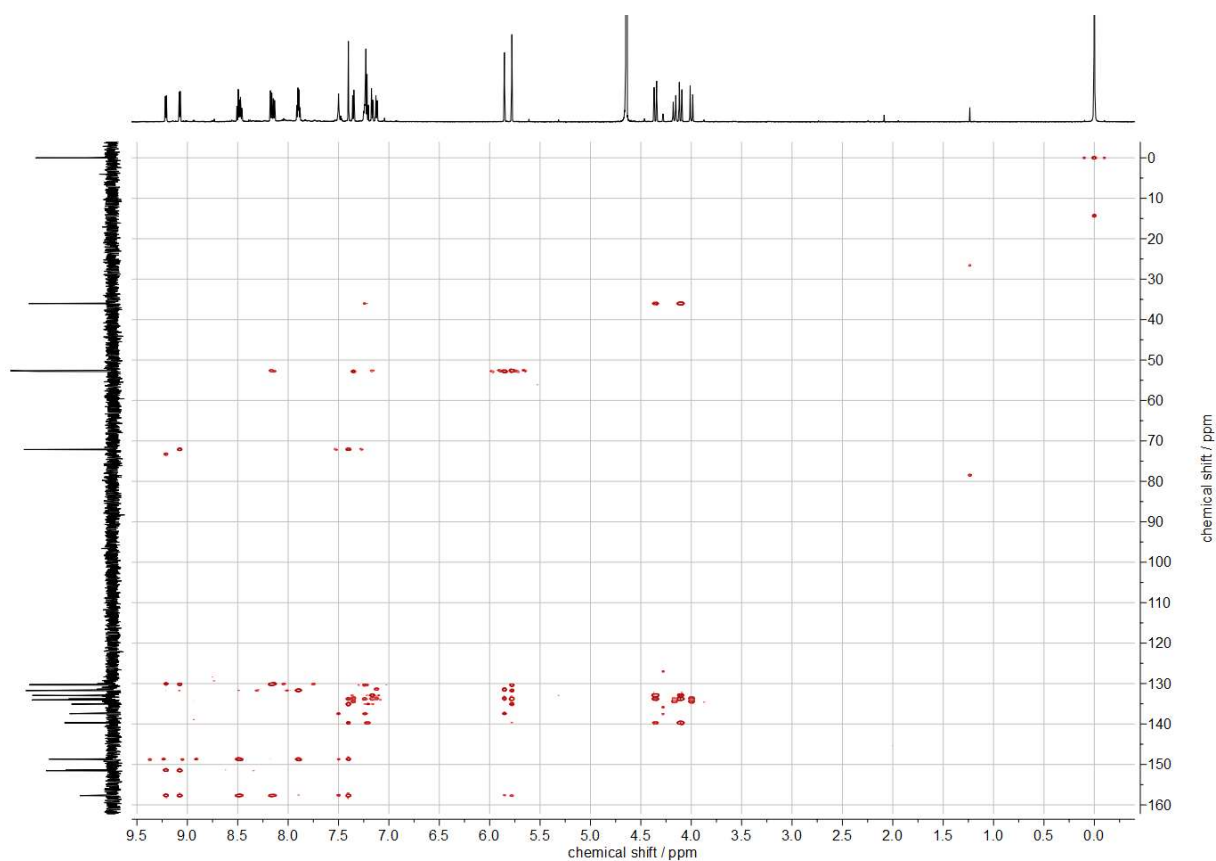

**Figure S53.** HMBC spectrum (125 MHz, D<sub>2</sub>O, 40 °C) of the photolysate of **4b**.

## 7 Literatur

---

<sup>1</sup> K. Suzuki, A. Kobayashi, S. Kaneko, K. Takehira, T. Yoshihara, H. Ishida, Y. Shiina, S. Oishi and S. Tobita, *Phys. Chem. Chem. Phys.*, 2009, **11**, 9850.

<sup>2</sup> F. H. Stootman, D. M. Fisher, A. Rodger and J. R. Aldrich-Wright, *Analyst*, 2006, **131**, 1145.
